# Supplementary material for: HMGB1-mediated elevation of KLF7 facilitates hepatocellular carcinoma progression and metastasis through upregulating TLR4 and PTK2
Source: PubMed Central journal article supplement (PMC10405848; doi:10.7150/thno.84388), 2023-07-14
Supplement: thnov13p4042s1.pdf [file thnov13p4042s1.pdf]

## **Supplementary materials**

### **Materials and Methods**

#### **Cell culture**

HCC cells (Huh1, Huh6, Huh7, JHH-7, and SNU878) were purchased from the Institute of Biochemistry and Cell Biology, Chinese Academy of Science, China. Human HCC cells (HepG2, Hep3B, PLC/PRF/5, SNU398) were purchased from the American Type Culture Collection. Additional human HCC cells (MHCC97L, MHCC97H, HCCLM3, and HCCLM6) were kindly provided by Dr. Tang ZY (Liver Cancer Institute, Zhongshan Hospital, Fudan University, Shanghai, China). Cells were cultured in Dulbecco's Modified Eagle Medium (DMEM) or RPMI-1640 medium at 37 °C in a 5% CO<sub>2</sub> incubator. The medium was supplemented with 10% FBS, 100 µg/mL penicillin, and 100 µg/ mL streptomycin. These above cell lines were authenticated by short tandem repeats (STRs) DNA profiling. All cells were tested for mycoplasma contamination before use with the Universal Mycoplasma Detection Kit (ATCC 30-1012K) and were not contaminated by mycoplasma.

#### **Patients and follow-up**

This study was approved by the Ethics Committee of Tongji Medical College, and all patients provided full consent for the study. Cohort I included 177 adult patients with HCC who underwent curative resection between 2003 and 2005 at the Tongji Hospital of Tongji Medical College (Wuhan, China). Cohort II included 118 adult patients with HCC who underwent curative resection between 2006 and 2008 at the Tongji Hospital

of Tongji Medical College (Wuhan, China). A preoperative clinical diagnosis of HCC was based on the diagnostic criteria of the American Association for the Study of Liver Diseases. The inclusion criteria were as follows: (a) distinctive pathologic diagnosis; (b) no preoperative anticancer treatment or distant metastases; (c) curative liver resection; and (d) complete clinicopathologic and follow-up data. The differentiation statuses were graded according to the method of Edmondson and Steine. The pTNM classification for HCC was based on The American Joint Committee on Cancer/International Union Against Cancer staging system (6th edition, 2002). Follow-up data were summarized at the end of December 2013 (Cohort I) and December 2016 (Cohort II, range 4-96 months) respectively. The patients were evaluated every 2-3 months during the first 2 years and every 3-6 months thereafter. All follow-up examinations were performed by physicians who were blinded to the study. During each check-up, the patients were monitored for tumor recurrence by measuring the serum AFP levels and by performing abdominal ultrasound examinations. Computed tomography and/or magnetic resonance imaging examination was performed every 3-6 months, together with a chest radiographic examination. The diagnostic criteria for HCC recurrence were the same as the preoperative criteria. The time to recurrence and overall survival were the primary endpoints. The time to recurrence was calculated from the date of resection to the date of a diagnosis with tumor recurrence. The overall survival was calculated from the date of resection to the date of death or of the last follow-up.

In addition, 10 normal liver tissues and 25 pairs of adjacent nontumor and HCC

tissues preserved in liquid nitrogen were used for examining the mRNA levels of *KLF* family genes (Figure S1); 20 normal liver tissues and 50 pairs of HCC tissues and adjacent nontumor tissue samples preserved in liquid nitrogen were used to detect the mRNA expression of *KLF7* (Figure 1C); 16 pairs of fresh adjacent nontumor tissues, primary HCC tissues and matched metastatic HCC tissues were collected after surgical resection and were used for *KLF7* IHC staining (Figure 1E); 20 pairs of fresh adjacent nontumor tissues, primary HCC tissues and matched metastatic HCC tissues were collected after surgical resection and were used to detect the expression profiles of HMGB1, *KLF7*, *TLR4*, and *PTK2* (Figure 6G, Figure S8).

### **Plasmid construction**

Plasmid construction was performed according to standard procedures. The primers were shown in Table S8. For example, the *KLF7* gene complete CDS construct, pCMV-*KLF7*, was generated by using cDNA from human PBMCs. It was generated with forward and reverse primers incorporating *EcoRI* and *HindIII* sites at the 5' and 3'-ends, respectively. The polymerase chain reaction (PCR) product was cloned into the *EcoRI* and *HindIII* sites of the pCMV-Tag2B vector. The *TLR4* promoter construct, (-1918/+473) *TLR4*, was generated from human genomic DNA. This construct corresponds to sequence from -1918 to +473 (relative to the transcriptional start site) of the 5'-flanking regions of human *TLR4* gene. It was generated with forward and reverse primers incorporating *SacI* and *NheI* sites at the 5' and 3'-ends, respectively. The polymerase chain reaction (PCR) product was cloned into the *SacI* and *NheI* sites

of the pGL3-Basic vector (Promega). The 5'-flanking deletion constructs of the *TLR4* promoter, (-464/+473) *TLR4*, (-228/+473) *TLR4*, (-40/+473) *TLR4* were similarly generated using the (-1918/+473) *TLR4* construct as the template. The KLF7 binding sites in the *TLR4* promoter were mutated using the QuikChange II Site-Directed Mutagenesis Kit (Stratagene). The constructs were confirmed by DNA sequencing. Other promoter constructs were cloned in the same manner.

### **Construction of lentivirus and stable cell lines**

Lentiviral vectors encoding shRNAs were generated using PLKO.1-TRC (Addgene) and designated as LV-shKLF7, LV-shTLR4, LV-shPTK2, LV-shRAGE, LV-shp65, and LV-shcontrol. "LV-shcontrol" is a non-target shRNA control. The vector "pLKO.1-puro Non-Target shRNA Control Plasmid DNA" (purchased from Sigma, SHC016) contains an shRNA insert that does not target any known genes from any species. The shRNA sequences can be found in Table S9. Lentiviral vectors encoding human KLF7, TLR4, PTK2, and HMGB1 genes were constructed in pLV-puro or pLV-neo (Addgene) and designated as LV-KLF7, LV-TLR4, LV-PTK2 and LV-HMGB1. An empty vector was used as the negative control and was designated as LV-control. The lentivirus and cell infection were produced according to the lentiviral vector protocol recommended by Addgene. Briefly, the lentiviral plasmid and packaging plasmids pMD2.G and psPAX2 (Addgene plasmid #12259 and #12260) were transfected into HEK-293T cells with transfection reagent (Lipofectamine®3000, Thermo Fisher Scientific) and OPTI-MEM media (Invitrogen, Waltham, MA, USA). The lentiviruses were harvested twice on days

4 and 5. Viruses were filtered with a 0.45µm filter and stored at -80 °C. Lentiviral infection of target cells were performed in cell culture media with 5 µg/ mL polybrene (Sigma H9268). Seventy-two hours after infection, cells were selected for 2 weeks using 2.5 µg/mL puromycin (OriGene). Selected pools of cells were used for the following experiments.

### **Transient transfection**

The cells were plated at a density of  $1 \times 10^5$  cells/well in a 24-well plate. After 12-24 hours, the cells were co-transfected with 0.6 µg of expression vector plasmids, 0.18µg of promoter reporter plasmids, and 0.02 µg of pRL-TK plasmids using Lipofectamine 2000 (Invitrogen, USA) according to the manufacturer's instructions. After 6h of transfection, the cells were washed and allowed to recover overnight in fresh medium supplemented with 1% FBS for 48 h. Serum-starved cells were used for the assay.

### **Luciferase reporter assay**

Luciferase activity was detected using the Dual Luciferase Assay (Promega, USA) according to the manufacturer's instructions. The transfected cells were lysed in culture dishes containing a lysis buffer and the resulting lysates were centrifuged at maximum speed for 1 min in a microcentrifuge. Relative luciferase activity was determined using a Modulus™ TD20/20 Luminometer (Turner Biosystems, USA), and the transfection efficiencies were normalized according to the Renilla activity.

## Western blot analysis

Proteins from lysed cells were fractionated by SDS-PAGE and transferred to nitrocellulose membranes. Nonspecific binding sites were blocked with 5% BSA in TBST (120 mM Tris-HCl (pH 7.4), 150 mM NaCl, and 0.05% Tween 20) for 2 hours at room temperature. Blots were incubated with a specific antibody overnight at 4 °C. Western blotting of  $\beta$ -actin on the same membrane was used as a loading control. The membranes were then washed with TBST 3 times and incubated with an HRP-conjugated secondary antibody. Proteins were visualized using an Immobilon<sup>TM</sup> Western Chemiluminescent HRP substrate (Millipore, USA).

The primary antibodies used are listed below.

| Antibodies                         | Source                            |
|------------------------------------|-----------------------------------|
| anti-KLF5                          | Cell signaling technology, #51586 |
| anti-KLF7                          | Abcam, ab197690                   |
| anti-KLF8                          | Abcam, ab168527                   |
| anti-KLF13                         | Proteintech, 18352-1-AP           |
| anti-TLR4                          | Proteintech, 66350-1-Ig           |
| anti-PTK2                          | Cell signaling technology, #3285  |
| anti-RAGE                          | Abcam, ab216329                   |
| anti-NF- $\kappa$ B p65            | Cell signaling technology, #8242  |
| anti-p-NF- $\kappa$ B p65 (Ser536) | Cell signaling technology, #3033  |
| anti-Akt                           | Cell signaling technology, #4691  |
| anti-p-Akt (Ser473)                | Cell signaling technology, #4060  |

|                               |                                  |
|-------------------------------|----------------------------------|
| anti-JNK                      | Cell Signaling Technology, #9252 |
| anti-p-JNK (Thr183/Tyr185)    | Cell Signaling Technology, #4668 |
| anti-ERK1/2                   | Cell Signaling Technology, #4695 |
| anti-p-ERK1/2 (Thr202/Tyr204) | Cell Signaling Technology, #4370 |
| anti-p38                      | Cell Signaling Technology, #8690 |
| anti-p-p38 (Thr180/Tyr182)    | Cell signaling technology, #4511 |
| anti-HMGB1                    | Abcam, ab227526                  |
| anti-p-PTK2 (Tyr397)          | Cell signaling technology, #3283 |
| anti- $\beta$ -actin          | Proteintech, 60008-1-Ig          |
| anti-GADPH                    | Cell signaling technology, #5174 |

### **Quantitative Real-time PCR (RT-qPCR)**

The RNeasy Plus Mini Kit (50) kit (Qiagen, Hilden, Germany) was used to extract total RNA, which was then reverse transcribed with the Advantage RT-for-PCR Kit (Qiagen) in accordance with the manufacturer's protocols. The target sequence was amplified with real-time PCR with the SYBR Green PCR Kit (Qiagen). The cycling parameters used were 95 °C for 15 s, 55-60 °C for 15 s, and 72 °C for 15 s for 45 cycles. Melting curve analyses were performed, and Ct values were determined during the exponential amplification phase of real-time PCR. SDS 1.9.1 software (Applied Biosystems, Massachusetts, USA) was used to evaluate amplification plots. The  $2^{-\Delta\Delta Ct}$  method was used to determine relative fold changes in target gene expression in cell lines, which was normalized to expression levels in corresponding control cells (defined

as 1.0). The equation used was  $2^{-\Delta\Delta Ct}$  ( $\Delta Ct = Ct^{\text{target}} - Ct^{\text{ATCB}}$ ;  $\Delta\Delta Ct = \Delta Ct^{\text{expressing vector}} - \Delta Ct^{\text{control vector}}$ ). When calculating relative expression levels in surgically extracted HCC samples, relative fold changes in target gene expression were normalized to expression values in normal liver tissues or adjacent nontumor tissues (defined as 1.0) using the following equation:  $2^{-\Delta\Delta Ct}$  ( $\Delta\Delta Ct = \Delta Ct^{\text{tumor}} - \Delta Ct^{\text{nontumor}}$ ). All experiments were performed in duplicate. The primer sequences were listed in Table S8.

### **Chromatin immunoprecipitation Assay (ChIP)**

Cells were immersed in 1% formaldehyde for 10 minutes at 37 °C to stimulate cross-linking. Then, glycine was used to quench the formaldehyde after cross-linking to stop formaldehyde fixation. After washing with PBS, the cells were resuspended in lysis buffer (1 mM PMSF, 1% SDS, 10 mM EDTA and 50 mM Tris (pH 8.1) – total volume 300  $\mu$ l). Sonication was then performed to produce fragmented DNA. A slurry of protein G-Sepharose and herring sperm DNA (Sigma-Aldrich) was used to clear the supernatant. The recovered supernatant was then subjected to a 2-hour incubation period with specific antibodies or an isotype control IgG in the presence of protein G-Sepharose beads and herring sperm DNA, followed by antibody denaturation with 1% SDS in lysis buffer. Precipitated DNA was extracted from the beads by immersing them in a 1.1 M NaHCO<sub>3</sub> solution and 1% SDS solution at 65 °C for 6 hours. Immunoprecipitated DNA was retrieved from the beads by immersion in 1% SDS and a 1.1 M NaHCO<sub>3</sub> solution at 65 °C for 6 hours. The DNA was then purified using a PCR Purification Kit (QIAGEN, USA). The primers were shown in Table S8.



For ChIP assays of tissues, cells were first separated from six fresh frozen HCC tissues and three normal liver tissues collected after surgical resection. In detail, surgically extracted tumor tissues were first washed by 1×cold, PBS, 5min, for three times and added to medium supplemented with antibiotic and antifungal agents. Use a clean razor blade to cut a pie of tissue (around 5mm<sup>3</sup>) into small piece (typical 1mm<sup>3</sup> or smaller). Then, digestion the tissues with DNase I (20 mg/mL; Sigma-Aldrich) and collagenase (1.5 mg/mL; Sigma-Aldrich) and placed on table concentrator, 37°C, for 1h. At the end of the hour, we filtered the dissociated cells through 100-µm-pore filters rinsed with fresh media. The 1×red cell lysis was added to the tissues and incubated for 5 minutes to lysis the red blood cell, followed by another rinse. The dissociated cells were crosslinked using 1% formaldehyde for 10 minutes at 37°C. After cell lysis, the DNA was fragmented by sonication. ChIP grade antibody or IgG (negative control) was used to immunoprecipitated the fragment DNA. Then, qRT-PCR was used to amplify the corresponding binding site on the promoters.

### **Cell treatment**

Established HCC cell lines were seeded in 6-well plates and allowed to attach overnight. Reagents used to treat these cells for 24 hours.

| Reagents | Source              |
|----------|---------------------|
| IL-1β    | PeptoTech (10ng/mL) |
| IL-6     | PeptoTech (50ng/mL) |
| IL-8     | PeptoTech (50ng/mL) |

|                             |                                               |
|-----------------------------|-----------------------------------------------|
| IL-17A                      | PeptoTech (50ng/mL)                           |
| TGF- $\beta$                | PeptoTech (5ng/mL)                            |
| TNF- $\alpha$               | PeptoTech (10ng/mL)                           |
| LPS                         | Sigma-Aldrich (100ng/mL)                      |
| HMGB1                       | R&D Systems (0.25, 0.5, 0.75, 1.0 $\mu$ g/mL) |
| ERK inhibitor U0126         | MedChemExpress (10 $\mu$ M)                   |
| JNK inhibitor SP600125      | MedChemExpress (20 $\mu$ M)                   |
| p38 inhibitor SB203580      | MedChemExpress (20 $\mu$ M)                   |
| PI3K inhibitor LY294002     | MedChemExpress (10 $\mu$ M)                   |
| NF-kB inhibitor BAY 11-7082 | MedChemExpress (10 $\mu$ M)                   |
| TAK-242                     | MedChemExpress (50 $\mu$ M)                   |
| Defactinib                  | Selleck (10 $\mu$ M)                          |

### **In vitro migration and invasion assays**

Transwell inserts were placed inside 24-well cell culture plates (Corning, USA). The upper chamber was coated with 60 $\mu$ L of Matrigel (Corning, 200 mg/mL) and dried overnight for invasion assays. For the migration and invasion assays,  $5 \times 10^4$  and  $1 \times 10^5$  cells, respectively, were plated in the top chamber, and the lower chamber was filled with 600 $\mu$ L of complete medium. After incubation for 24h, the cells on the upper surface of the membranes were removed by swabbing, and the cells on the lower surface were fixed with methanol for 15 min and stained with 0.1% crystal violet for 15min. The average number of cells in five fields per membrane was counted on three inserts.

### **Colony formation assay**

Transfected cells (1000 per well) were cultured in 6-well plates. After 10–14 days of culture, the cells formed stable colonies. The cell colonies were fixed with 70% ethanol and then stained with a crystal violet solution for 10 minutes. Colonies containing more than 50 cells were counted and each group included three replicates.

### **Construction of tissue microarrays and immunohistochemistry**

HCC samples and the corresponding adjacent liver tissues were used to construct a tissue microarray (Shanghai Biochip Co., Ltd. Shanghai, China). IHC was performed on 4- $\mu$ m-thick, routinely processed paraffin-embedded sections. Briefly, the tissue sections were deparaffinized after baking at 60 °C for an hour. Endogenous peroxidase activity was blocked by 3% (vol/vol) hydrogen peroxide in methanol for 12 min and washes with phosphate-buffered saline (PBS). Then the slides were immersed in 0.01 mol/L citrate buffer solution (pH 6.0) and placed in a microwave oven for 30 min. After washed with PBS, the sections were incubated with bovine serum albumin (BSA) for 30 min, then incubated with the primary antibody diluted in PBS containing 1% (wt/vol) bovine serum albumin in 4 °C for overnight. The tissue microarrays were stained for KLF7 (Sigma-Aldrich, HPA030490, for human; Abcam, ab197690, for mouse), TLR4 (Abcam, ab22048, for human and mice), PTK2 (Cell signaling technology, #3285, for human and mice), HMGB1 (Cell signaling technology, #6893, for human and mice), p-p65 (Abcam, ab86299, for human; ABclonal, AP0475, for mouse). Negative controls

were performed by replacing the primary antibody with preimmune mouse serum. After washed with PBS, the sections were treated with a peroxidase-conjugated second antibody (Santa Cruz) for 30 min at room temperature and then washed with PBS. Reaction product was visualized with diaminobenzidine for 2 min. Images were obtained under a light microscope (Olympus, Japan) equipped with a DP70 digital camera.

Analyses were performed by two independent observers who were blinded to the clinical outcome. The immunostaining intensity was scored on a scale of 0 to 3: 0 (negative), 1 (weak), 2 (medium) or 3 (strong). The percentage of positive cells was evaluated on a scale of 0 to 4: 0 (negative), 1 (1%-25%), 2 (26%-50%), 3 (51%-75%), or 4 (76%-100%). The final immuno-activity scores were calculated by multiplying the above two scores, resulting an overall score which range from 0~12. Each case was ultimately considered “negative” if the final score ranges from 0~3, and “positive” if the final score ranges from 4~12 as described previously [1].

### **The Human Liver cancer RT<sup>2</sup> profiler PCR array**

The Human Liver cancer PCR array was applied to PLC/PRF/5-KLF7 cells and PLC/PRF/5-control cells. RNA extraction, DNase treatment, and RNA cleanup were performed according to the manufacturer’s protocol (Qiagen). The cDNA of each group was synthesized using the RT<sup>2</sup> First Strand Kit (Qiagen). Gene expression profiling of PLC/PRF/5-control and PLC/PRF/5-KLF7 cells was conducted using the Human liver cancer RT<sup>2</sup> Profiler PCR Array, which represents 84 genes known to be involved in

liver cancer. The cDNA synthesis reaction was mixed with 2× RT<sup>2</sup> qPCR SYBR Green Mastermix and ddH<sub>2</sub>O, and then dispensed to the PCR array 96-well plate (25 μL/well). A 2-step cycling program was performed using the Bio-Rad CFX96. Data normalization was done by correcting all Ct values based on the average Ct values of several housekeeping genes present on array. Each assay was conducted in triplicate.

### ***Klf*<sup>f/f</sup> mice and AAV8 administration**

The *Klf*<sup>f/f</sup> mice on the C57BL/6J background were created by CRISPR/Cas9-mediated genome engineering. The exon 2 was selected as a conditional knockout region and flanked by LoxP sites and deleted upon Cre-mediated recombination. To induce conditional knockout of *Klf7* in hepatocytes, adeno-associated virus serotype 8 (AAV8) was constructed to express TBG-Cre recombinase in hepatocytes specially. 6-week-old male *Klf*<sup>f/f</sup> mice were given a tail-vein injection of AAV8-TBG-Cre or AAV8-TBG-null at the dose of 5×10<sup>11</sup> viral gene copies/mouse. To evaluate the Cre recombination efficiency, the expression levels of *Klf7* in mice hepatocytes were detected at 1 month and 3 months after AAV8 injection.

### **Hepatocytes and non-parenchymal cells isolation**

Hepatocytes and non-parenchymal cells were isolated after liver perfusion according to previously published protocol [2]. Briefly, the liver was perfused at the speed of 7 mL/min for 4 minutes through the portal vein with perfusion buffer containing collagenase IV. The resulting suspension was centrifuged at 50g and washed 3 times

with sterile Hank's solution, and the hepatocytes were in pellet and the non-parenchymal cells were in supernatant. Cells were then cultured and used for further analysis.

### **Cytoplasmic protein extraction**

Cytoplasmic protein extraction of indicated HCC cells was performed using a Nuclear and Cytoplasmic Protein Extraction Kit (Beyotime, P0027). Briefly,  $2 \times 10^6$  HCC cells were resuspended in 200  $\mu$ L of cytoplasmic protein isolation solution A and homogenized on ice for 10 min. Then, 10  $\mu$ L cytoplasmic protein isolation solution B was added, and the cells were resuspended and homogenized on ice for 1 min. The homogenate was centrifuged at 12000g for 5 min at 4 °C. The resulting supernatant was the cytoplasmic protein fraction.

### **Bioinformatics analysis**

Gene expression or gene signature expression in liver tumors and liver tumor metastatic tissues (Figure 1F, Figure S9A) was analyzed in the TNMplot database (<https://tnmplot.com/analysis/>) [2]. The expression correlation between two genes in the TCGA LIHC cohort (Figure S7) was performed in the (Gene Expression Profiling Interactive Analysis 2) GEPIA2 database (<http://gepia2.cancer-pku.cn/#index>) [3]. The prognostic significances of genes and gene sets on overall survival or disease-free survival of HCC patients (Figure S7, Figure S9B) were explored in the Kaplan-Meier Plotter (KM plotter) databases (<https://kmplot.com/analysis/>) [4].



**Figure S1**

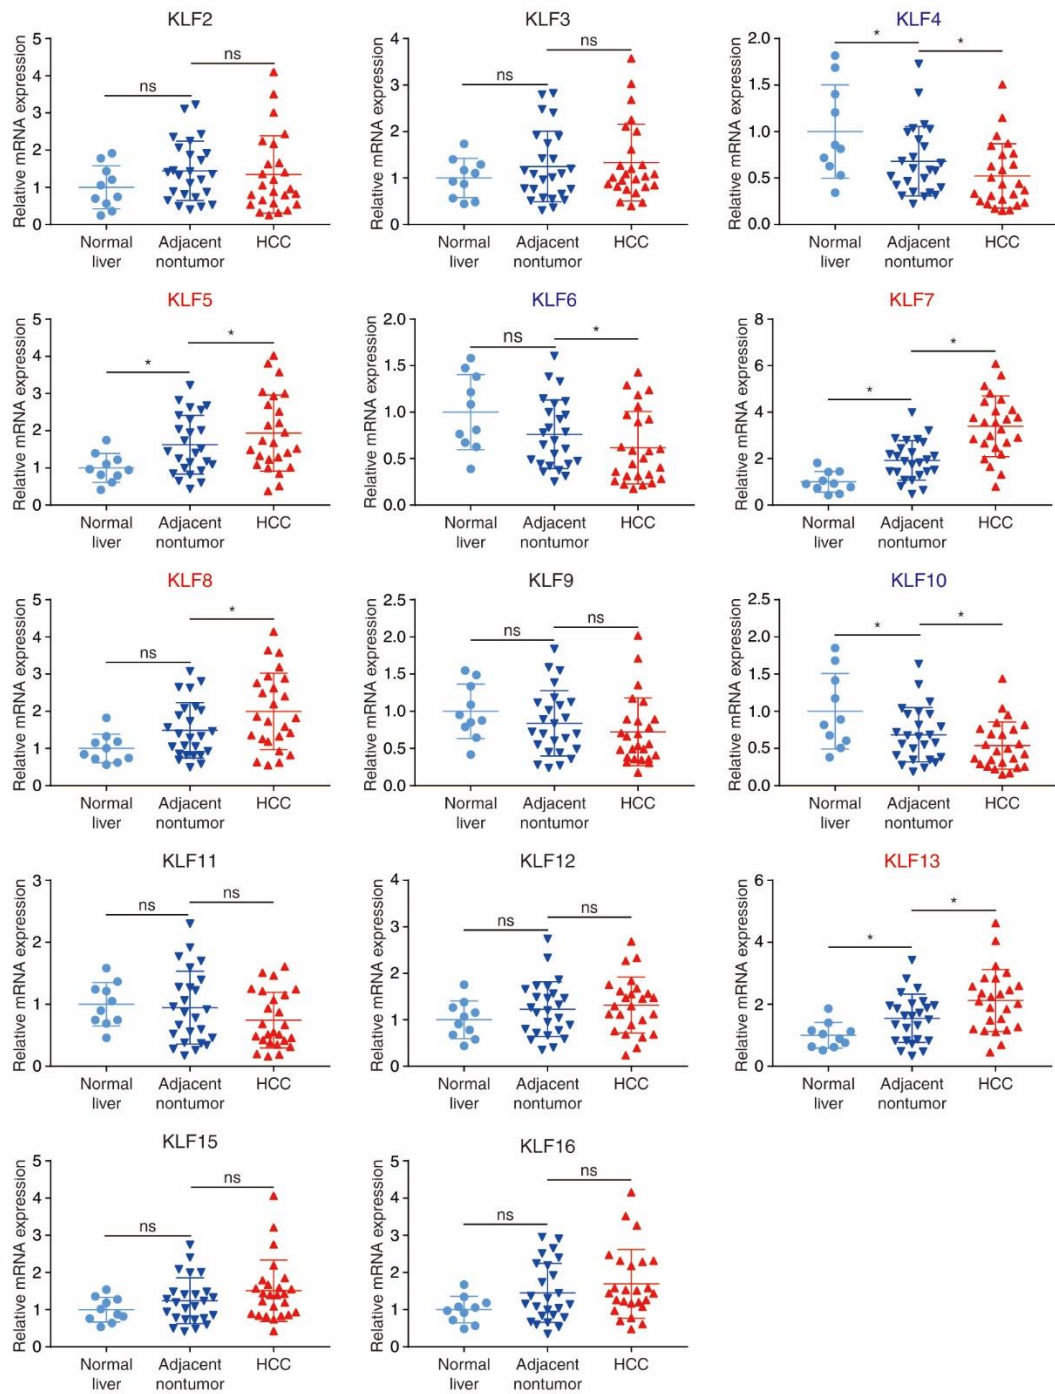

**Figure S1**

The mRNA levels of *KLF* family genes in normal livers (n = 10) and 25 pairs of adjacent nontumor and HCC tissues were detected by RT-PCR. *KLF7* is the most upregulated *KLF* gene in HCC tissues. \*P < 0.05.



**Figure S2**

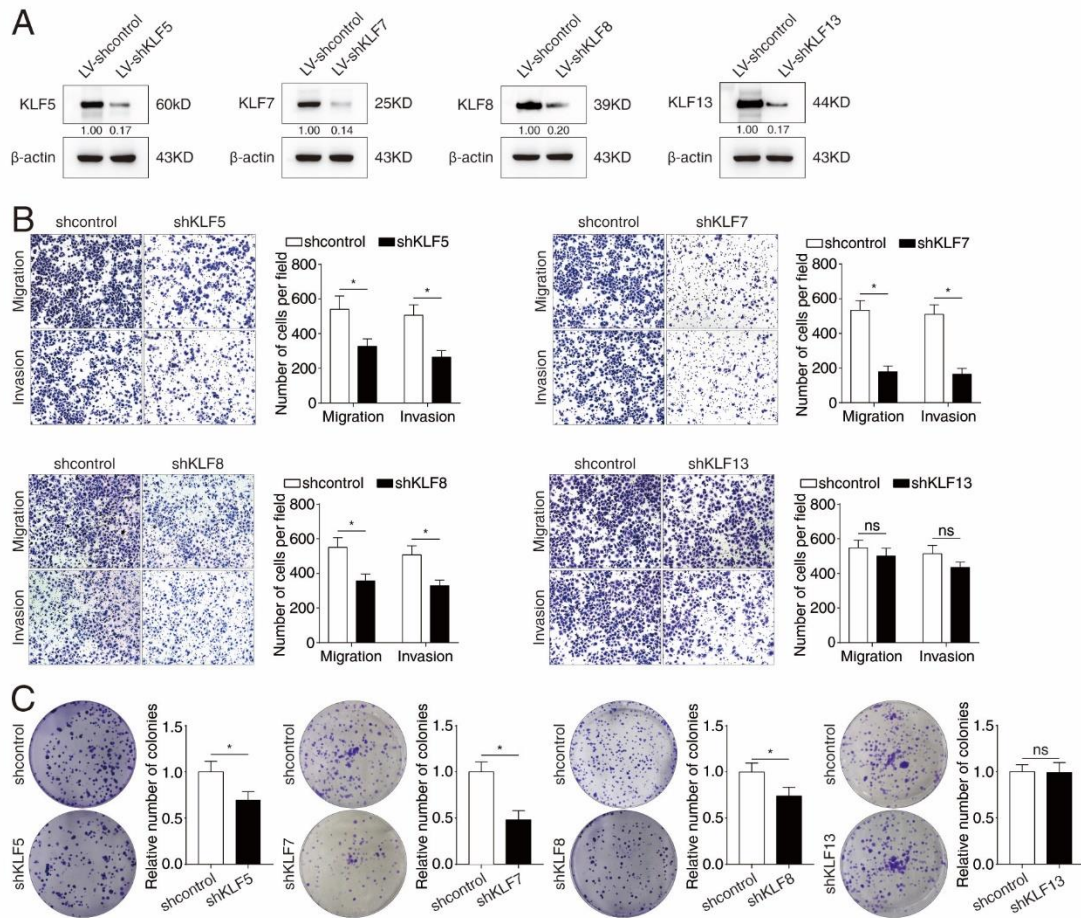

**Figure S2**

(A) The protein levels of KLF5, KLF7, KLF8, and KLF13 were detected by western blot in MHCC97H cells transfected with shRNA.

(B) Transwell assays were performed to analyze the migration and invasion of MHCC97H cells after the knockdown of KLF5, KLF7, KLF8, and KLF13.

(C) The proliferation abilities of the indicated MHCC97H cells were measured by clone formation assays.

\*P < 0.05.

**Figure S3**

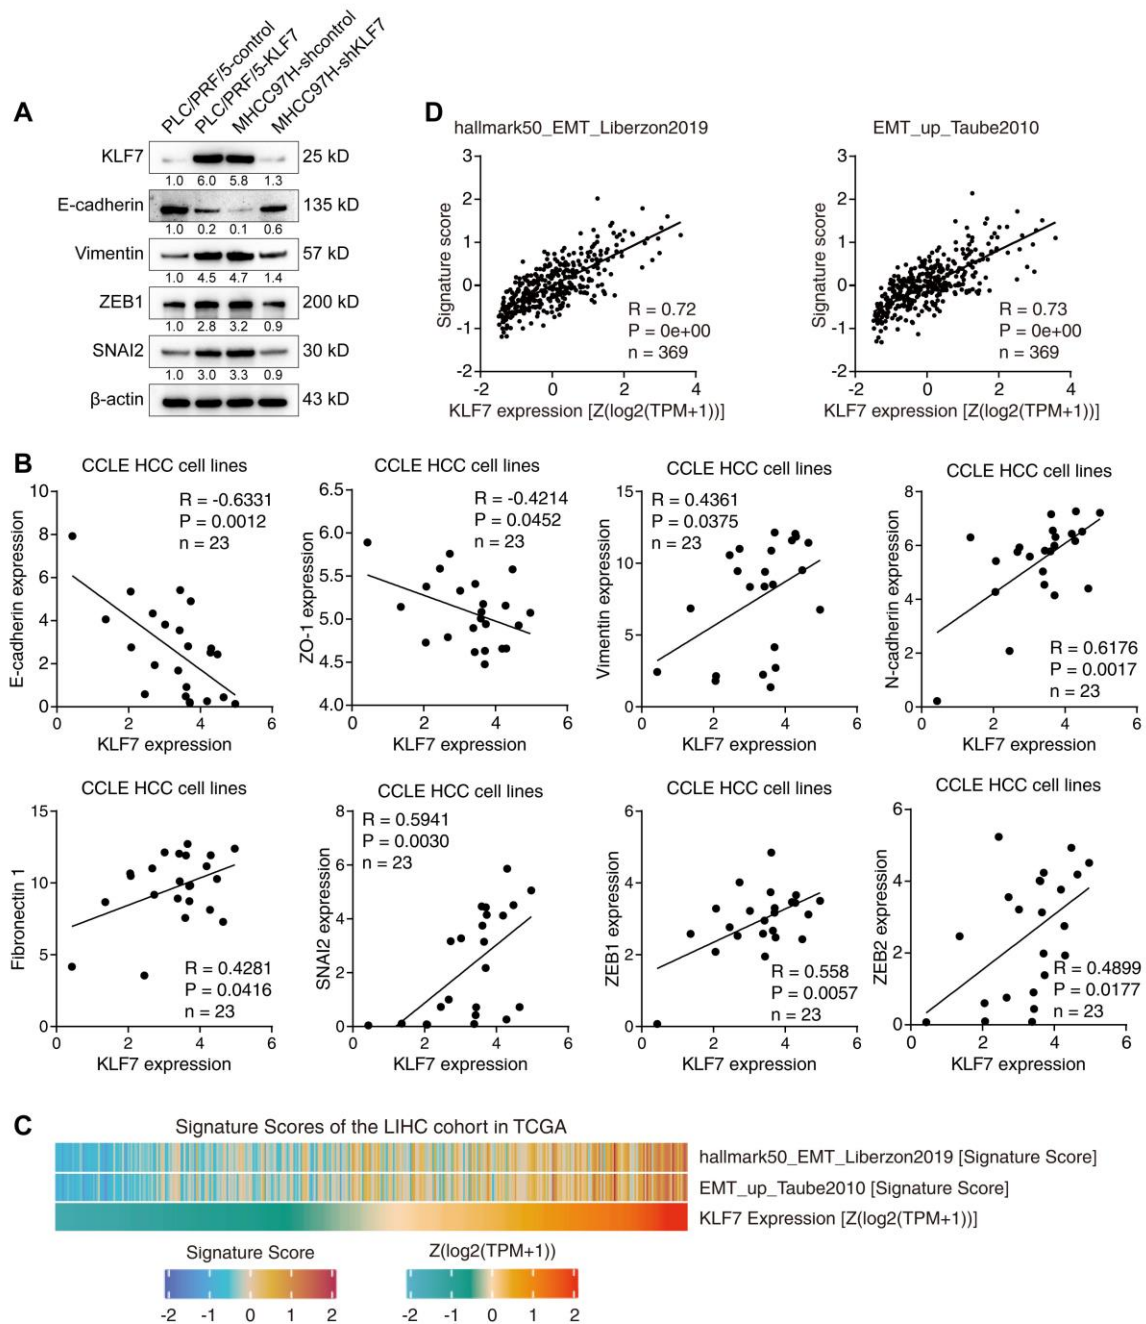

**Figure S3**

(A) Western blot analysis of epithelial markers (E-cadherin), mesenchymal markers (vimentin) and typical EMT-activating transcription factors (ZEB1, SNAI2) in the indicated HCC cells.

(B) Correlation analysis of *KLF7* expression and the expression of several EMT-related molecules in human HCC cell lines based on CCLE data.

(C) The heatmap displayed the scores of EMT gene signatures and *KLF7* expression in the TCGA LIHC samples.

(D) Correlation analysis between *KLF7* expression and the scores of EMT gene signature in the TCGA LIHC samples.

## Figure S4

### TLR4 Promoter (-1918 ~ +473)

>NC\_000009.12:117702485-117704875 Homo sapiens chromosome 9, GRCh38.p14 Primary Assembly

-1918 AGAAACTTACATTGCACTTGGCTACTTTCCAGACACTGTCTAAAAGCTTTACAAATGCCAGTTCAITTAATCCAATACAATACTTTGAGA  
-1827 TACATATTATCATCTTCATTCTATCCACATTTTCAATCCTCATCATAGCTCTCATTATGGAATGTAATGATGATGCTCTAGACTAGACGTTTT  
-1733 ACGTAAGTTAGCTTAATTCAGTAATTCAAAACACATGCGATTATCTTCGTTTTAAAGACCAGAAAATAAAGGTTGGTAGGTTTGATAAT  
-1642 TTGACTACCATTGCGTATCTTTATTTAATACATTTTATAAATGCAAGCTTCTGCTATGATTAAGGATTACCACATTTTACAGACCAGAA  
-1549 AGTAATAATAAGTGTGGTGAAGATGTGAAAAATGAGAATCCTGTACACCATTGTGGGAATGTAATGGTACAGATGCTGTGGAGA  
-1459 ATCATATGGTGGGTGCTCAAAAATTAATAATAGATTACCACATGATCCAGCAATCTCACTTCTGAGTACGTATCCAAAAGAATTGAAAA  
-1368 CAGAGACTTTAAGAGATATTGTACAACCATGTTTATGGCAGCATTATTCACAATAGCTAACGTGTGGCAACAATGCAAGTGTCCATGAAC  
-1277 AGACAAATGGATAAGCAAAATGTGGTCTATACATAACAATGGAATATTGTTACAGCTTTAAAAGGAAGGAGGCTTGTATCTACTACACAG  
-1186 AAAAGAACCCTTGAGGACATTATGCAAAGTGAATAAGCCAGTGACAAAAGATACATACTGTATGATCCACTTCTAAGAGCTGCCTAGA  
-1096 GTAGTCAAGATTATAGAGACAAAAGTAGTGCATAGATTCAAGGCCCTAGGGAAAGGGAAATGGGGAGTTATTTAATGAATAGTGGT  
-1006 GATGATTGTACAAAATATGAACATAATTAATGCCACTAAATTGTACACATACAAATGGTCAAGATAATAAATTTATGTTATGTCATGTTAT  
-913 GTTATGTGATTTACCATAATACAGAAAATGAAAAAGAAAAGAAAGAAAGTAAAGCTTAGCGGTTTACATGACTTGACCAATGCCTCAA  
-823 AGCCATGAGTACCCAGCTGAGATCTGAACCTCAGTATATCCATTCTGAAATCCCAGACTTTTCCCAATCTTCTGTACTTTTCAAACCTG  
-732 TGTTTCAGTTGAGGTTTATTTTCAGTTTTGTATGTGAGTTTCTTCAACAAGAA **GGGGCGGGC**CAAATTGTGCTGCAAAAACCTACATATC  
**KLF7 binding site 3**  
-641 GAAGTCTAACCCTCTACCTCAGACTATGACTGTATATGGAGAGAGAGCCTTGAAAGAGGTATGTAAGGTAGAATGAGGTCAATATGGT  
-550 GGCCCTAATCCAACATAACTGGTGTCTTATAAGAAGGGGAGATTAGAATTCAGACACTTGTGACACCTTGAGTTCAGACTGGAAGC  
-460 CTCTAGAATTGIGAGAAAATGAATGTCTGTTGTTAAGCCACCCAGTCTGTTGTTTCTTATGGCAGCCCCAGCAAACTAATACAATAG  
-368 TGTTTCCACAGCTGAAACAAAATTGGAAAATCACCGTCATCTAGAGAGTTACAAGGGCTATTTAATAGAACCTGATTGTTTCTAAATT  
-276 **CACCAAGCCCA**GGCAGAGGTCAGATGACTAATGGGATAAAAGCCAACTAGCTTCTCTTGTCTTTCTTTAGCCACTGGTCTGCAGGCG  
**KLF7 binding site 2**  
-186 TTTTCTTCTTAACCTTCTCTCTGTGACAAAAGAGATAACTATTAGAGAAACAAAAGTCCAGAATGCTAAGGTTGCCGCTTCACTTCC  
-95 TCTCACCTTTAGCCCAGAACTGCTTTGAATACACCAATTGCTGT **GGGGCGGCT**CGAGGAAGAGAAGACACCAGTGCCTCAGAACTGCT  
**KLF7 binding site 1**  
-5 **CGGTCAG**ACGGTGATAGCGAGCCACGCATTACAGGGCCACTGTGCTCAGAAAGCAGTGAGGATGATGCCAGGATGATGCTGCCTCG  
**Transcription starting site (nucleotide+1)**  
+86 CGCCTGGCTGGGACTCTGATCCAGCCATGGCCTTCTCTCTGCGTGAGACCAGAAAAGCTGGGAGCCCTGCGTGGAGGTATGTGGCTGG  
+176 AGTCAGTCTCTGAACTTCCCTCACTTCTGCCAGAACTTCTCACTGTGTGCCCTGGTTGTTTATTTTGCAAAAAAAAAAGAGTT  
+267 AAATTACCTTAAAGACTCAAGAAGCCACAGAGATCAAATAATTCATTGTTACAGGGCCTAGAGGCAGCCATTGGGGTTTGTTCATT  
+357 GGAAATTTGAGTCTAACAGGGCATGAGATAACATAGATCTGCTTAAGGTCCTGCTGTCTGCTACCTTGTGGCTCTGTGAAGAAATATC  
+448 AAACCTGTCTGAGACTAGTTTTCGCA

## Figure S4

KLF7 binding motifs within the *TLR4* promoter. The KLF7 binding sites are marked in yellow and the transcription start site is marked in red.

## Figure S5

**PTK2 Promoter (-1540 ~ +291)**

>NC\_000008.11:c141003619-141001789 Homo sapiens chromosome 8, GRCh38.p14 Primary Assembly

-1540 CTGCCCTTCAAGAACGTCAATTTCAAATGTATCGTGGCAGAGTCCAGGAAACAATATTGTGTAACACACTACCCTAA

-1463 AACCTAAAGGCTTAAAACCATGTATTTTATTGGCTCACAATCTGTGGTTTGCAATTTGGGTTGGATTGAGCTGG

-1385 GCAGTTCTTCCATCAGTCTCTCCAGGTCTTATGTATGCTTACA**GGGGCTGGG**TGGTCTAGTACAGCTCACTCACATG  
**KLF7 binding site 3**

-1307 TCTGGAGGTGGCACCTTGTGGCCAGGGTGCCTCAGTTCCTTCCACACGGCCTCCTCGTGAGGCTAGCTTGGGCTT

-1230 AAGGGGGGAAAATGAAAGCAGCATGGCCTCTTGAGGCCTAGGCTTGGAAATTTGTACAATGTCACCTTGTGACACATC

-1154 CCATTGGTCAAAGCAAGTTACAAGATCCCATCCACATCAAGGGTGAATAAATCCACCTCTTCTTGGGAAAAGTG

-1077 TCAAAGAATTGATGGCCATTTTAGTCTACTATGCTAAGTGCAGCCCTTCCCCAAAGTTATCCTTAATGCAGTCCCT

-998 TTGTGCCTCCACTCTCCTCTTTAATCCCATGCTTTTCTTATCCTTTAATAATAAGCTCTCACTTCACATCACCCAAA

-918 GCTTCGTTCACTTACTTGACAAATACTTACTGTGTGCCAGGACCTATTAGTGAACAAAACAAGCCCGTGTCTAATG

-840 AATCTAAGATTCTAGTGGAGAGAGCGGACAATCAAGAAATAAACAGAACACAGTGTGGGCTATGGTGAACAATA

-764 GGTGCTTTGGAGAACAACAGAGCAGACTAAGTGCAGGACTGTGTGTGAGGATAGC**AGGGCAGTG**GGTGGTTCTTATT  
**KLF7 binding site 2**

-688 ATATGAAGTGGTCGGCTGTATCAATGAGGTGATATAAGCAGGTATTGAACGAAGTGAGGAGCAAGAAGTCCAG

-611 GCAGAGCAAATAGCACGCGCAAAGGCCTGAGGCTGGCATGGAGAGGCAATTCCTTACAATTCATATGTAGTAAAAA

-534 GTAACAAAACCCAGAAAAACCAACCTTAATACATCTCATTAAAGAACAATACAACCCAAACATTTAAATATGGTA

-457 AAATCTTGATAAGCAAAGCTTTTATTTTACTTCAITTTTACTTTTATAAAAGCTCCTAATGCAATGACGTGTGTAC

-378 CTCTCTGGGCTTCAGGGTGTTCACCTTTCAAAGGCCTCGGTGCCTGTCTGTCTGCTTCTCGGCTTGTGGTTAGCAT

-300 CAAAATGACACCATAAAAAATGAAAGTGCAGCCTTGAGGGTCTTCTGGTTTCATTTCCGACCACAAGGTGCCAGA

-223 GTGACTTTTTTTTTTTTTTAAATAACACAAATCAGTTATCACTTCCCTGCTTAAAGCCCTCCAAAGGTTCCCTGTTGCCT

-144 AAAGAATAAACTCCAGGCACCTAAGCAAGCCCCACGCAGCCGTCTGCATTTTCAATCCCTCCAACCTCGCCTTTTG

-67 CTATT**CCCCACCC**ACCTACGGCACGTCCGGTCATAACCAACTAGCTCCTCGCTGAAACTGGCT**CACACCGGG**  
**KLF7 binding site 1** **Transcription starting site (nucleotide+1)**

+11 AAGCCCGGTTCGGTGTTCGGGGCAGCCTTCCCTCCTTTTCTGGAGCCCGTCTCAGGTCTGTAGCCCTCGGGAGGGA

+88 TTGCAGGGCTCGTTCCTGCTGGCGTTCAATTAGTAACCTGTCTACCTCCAGTGGACTTCTAAGTCCCTTTCATGATT

+167 TTTCACTTCCAAAATCAAATAATGGCCAGCCAACTTAGCTATAATGCCATGAAAAGAATCTCTGAGCCTCAGTTTC

+246 CTTGTCTGCAAAAAGGGCCAGGAACCGCTCGTTAGGGTTCGGTGTG

## Figure S5

KLF7 binding motifs within the *PTK2* promoter. The KLF7 binding sites are marked in yellow and the transcription start site is marked in red.

**Figure S6**

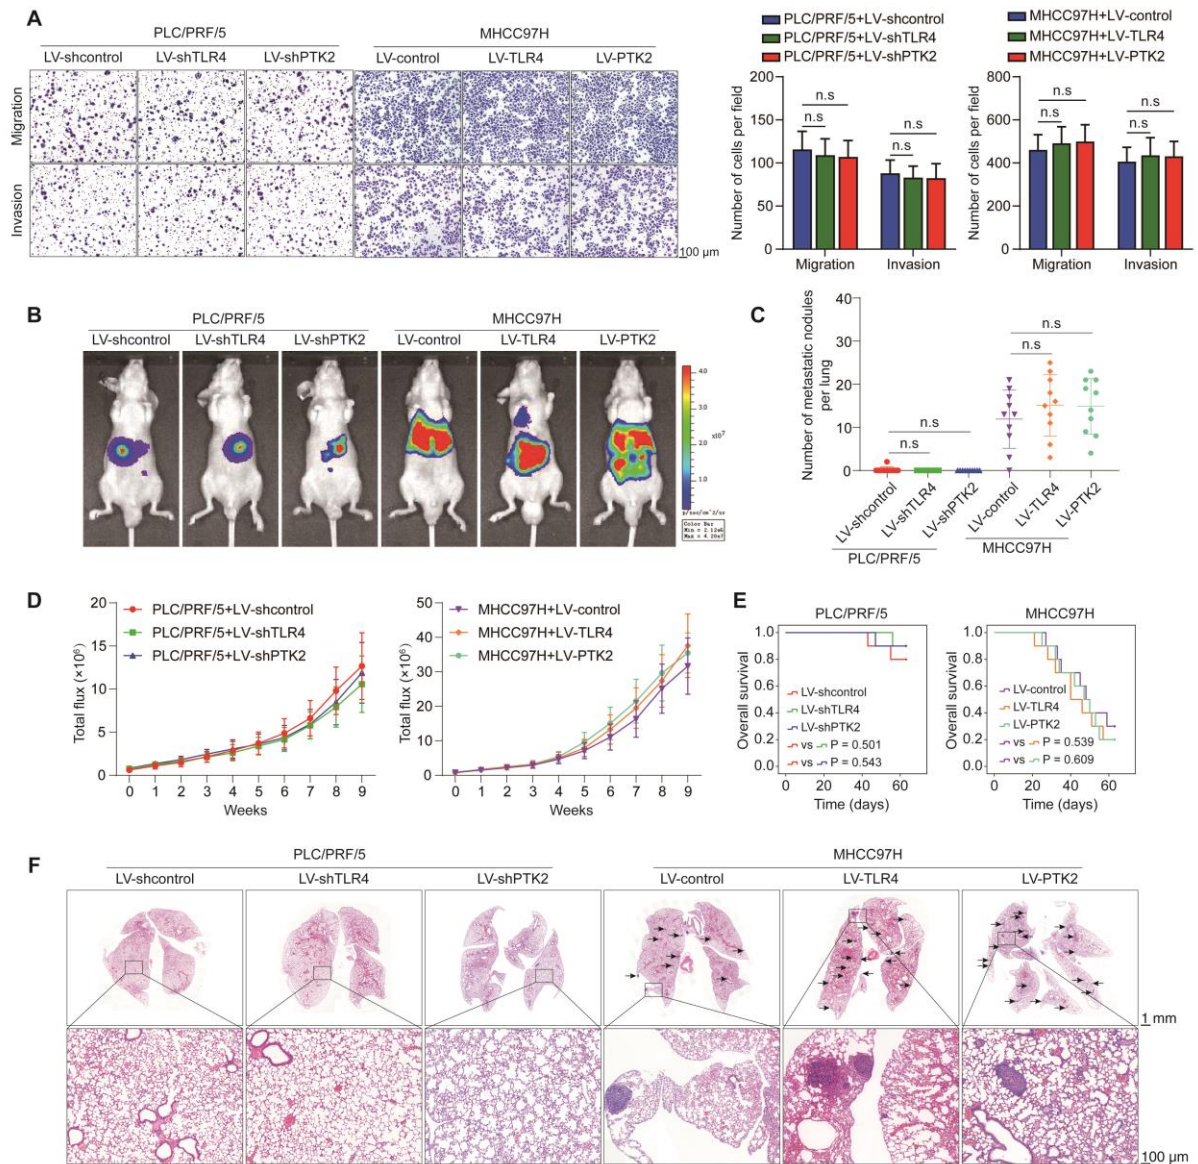

**Figure S6.** The impact of knockdown or overexpression of TLR4 or PTK2 on lung metastasis was less significant in the KLF7 non-manipulated state than in the KLF7 manipulated state.

(A) TLR4 or PTK2 expression was downregulated in PLC/PRF/5 cells and upregulated in MHCC97H cells through lentiviral transfection. The migratory and invasive

capacities of the indicated HCC cell lines were evaluated by transwell assays.

(B-F) Representative bioluminescent images (B), number of lung-colonizing nodules (C), bioluminescent signals of liver tumors (D), OS (E), and representative HE staining of lung tissues (F) in HCC orthotopic xenograft models.



Figure S7

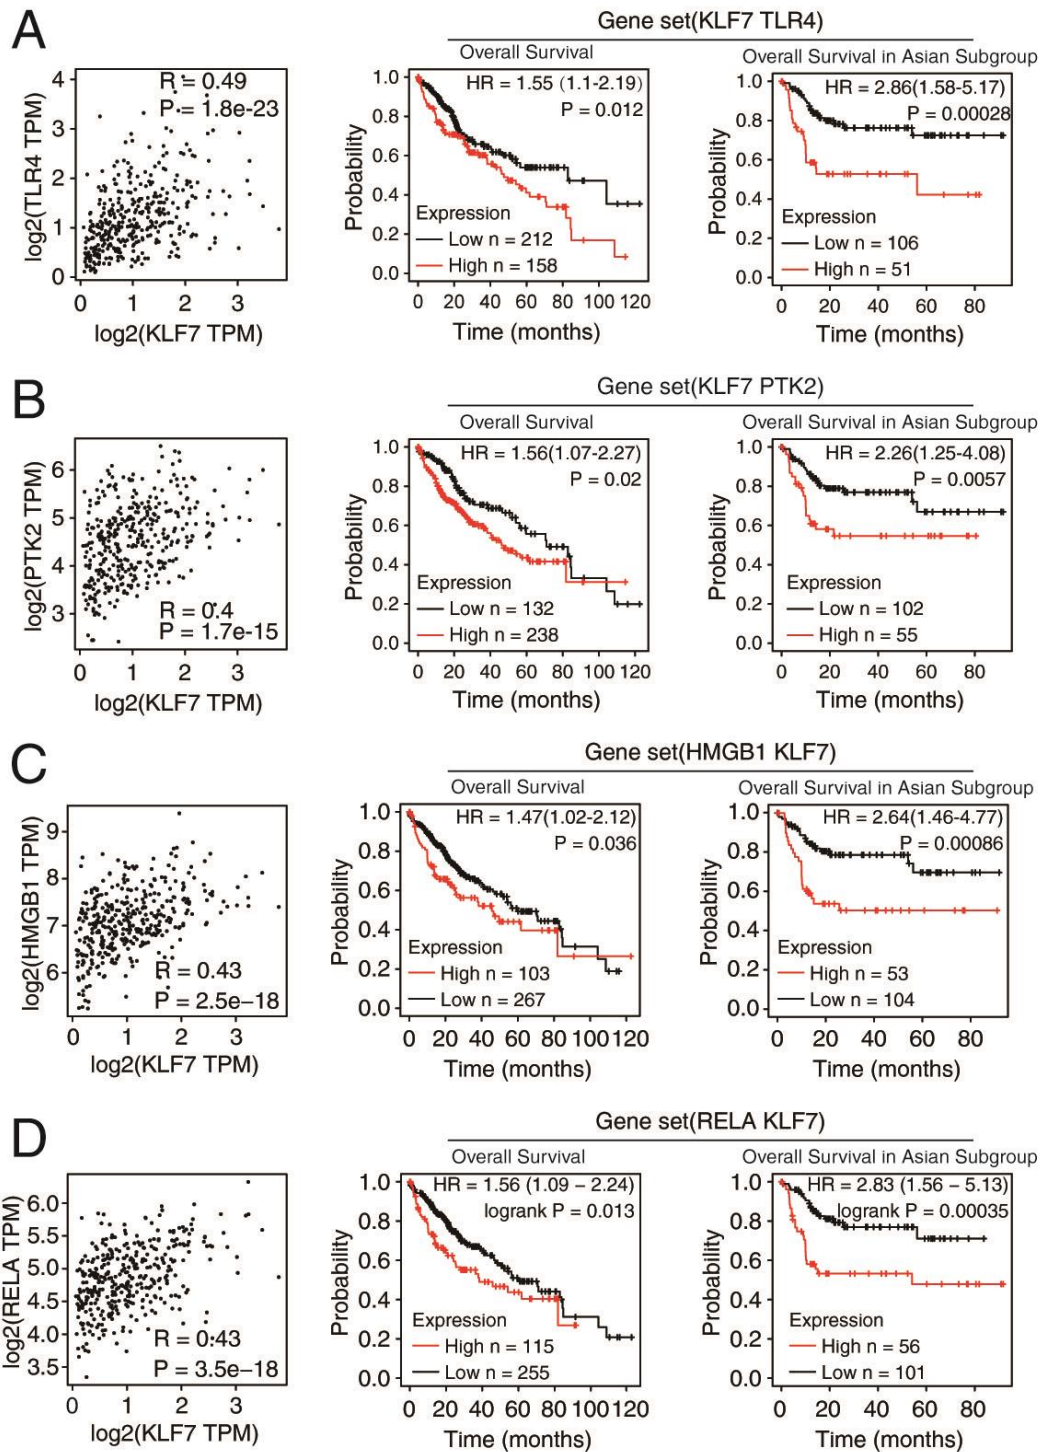

Figure S7

(A) Correlation analysis of *KLF7* expression and *TLR4* expression in the TCGA LIHC samples was performed in the GEPIA2 database. Survival analysis of the mean

expression levels of the *KLF7/TLR4* gene set on the overall survival of HCC patients from the TCGA LIHC cohort was performed in the KM-plotter database.

(B) Correlation analysis of *KLF7* expression and *PTK2* expression in the TCGA LIHC samples, and survival analysis of the mean expression levels of the *KLF7/PTK2* gene set on the overall survival of HCC patients from the TCGA LIHC cohort.

(C) Correlation analysis of *KLF7* expression and *HMGB1* expression in the TCGA LIHC samples, and survival analysis of the mean expression levels of the *HMGB1/KLF7* gene set on the overall survival of HCC patients from the TCGA LIHC cohort.

(D) Correlation analysis of *KLF7* expression and *RELA* expression in the TCGA LIHC samples, and survival analysis of the mean expression levels of the *RELA/KLF7* gene set on the overall survival of HCC patients from the TCGA LIHC cohort.

**Figure S8**

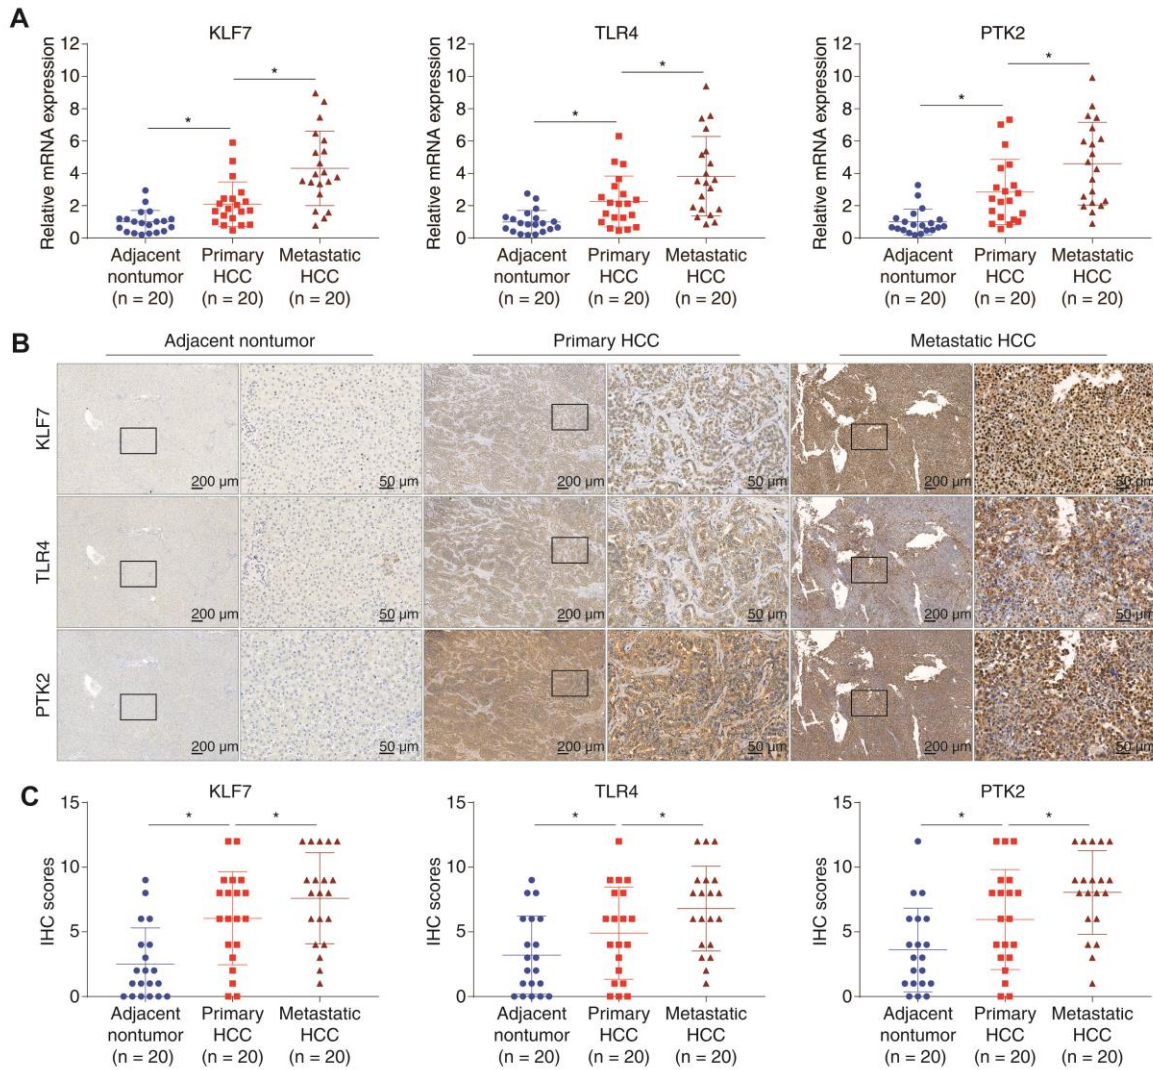

**Figure S8**

(G) The mRNA levels of *KLF7*, *TLR4*, and *PTK2* in 20 pairs of para-cancer nontumor specimens, primary HCC specimens and metastatic HCC specimens were measured by real-time PCR.

(H-I) Representative IHC staining (H) and IHC scores (I) of *KLF7*, *TLR4* and *PTK2* in paired adjacent nonneoplastic tissues, primary HCC tissues and metastatic HCC tissues.

**Figure S9**

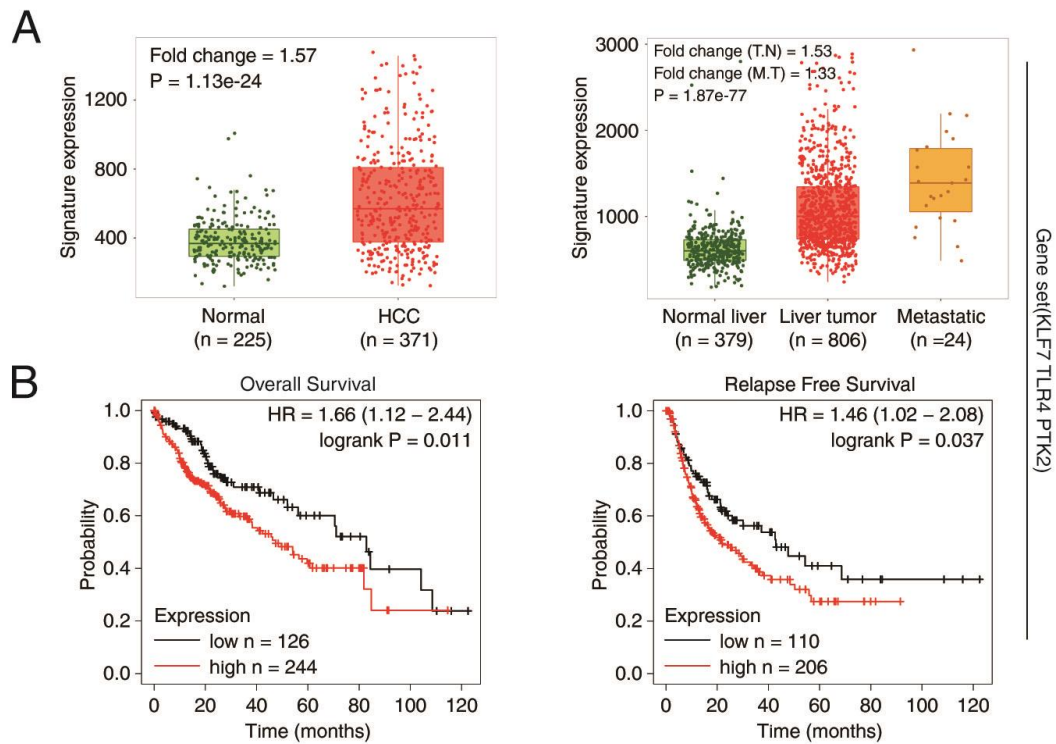

**Figure S9**

(A) The mean expression of the gene set (KLF7, TLR4, and PTK2) in adjacent normal liver tissues, liver cancer tissues, and liver cancer metastatic tissues. Data from the TNMplot database.

(B) The correlations between the mean expression levels of the gene set (KLF7, TLR4, and PTK2) and overall survival or relapse-free survival in the TCGA LIHC patients were evaluated in the KM-plotter database.

## Figure S10

### KLF7 Promoter (-1986 ~ +336)

>NC\_000002.12:c207175837-207173516 Homo sapiens chromosome 2, GRCh38.p14 Primary Assembly

-1986 ACATGTAGAAAGGACAAAACAAAAGAGGATTGCTTTAACATGAATATTCCTCAAAGATTGAAAATTGATATCACAGAAAAGGAAAGGAT  
-1897 TGGGGCTTATATGTGGCACAACGAGAGCTGGG **TGGAATTCC**CATTGGACAAATTGGGTAAGAGGAGTAAGCCTCTCTGAGTTATGCTA  
**NF-κB binding site 4**  
-1807 CCTTTTGGTCTTCATCAAATGAGATTGCACTGGCTTCCCAAATAATGACCAAAGGGAGGCAGAGCAGCTAAGGGCATACTTCCACGATG  
-1717 CCCAGTTTGGGAGAAGCCAAAATGAAAT **TGACACA**GTATAAAGCATGACCACATTGCTTCAAACAATCTTTGAGCATTGCAAAGCGGGA  
**AP-1 binding site 3**  
-1628 GGAGAAGAGAGTTAGGGGAATTGTGAAGCATTCTGAGAGGGGCATTGAAGCATTATTTCTCCCATTTAGATGGCACAATGGAGGAATTT  
-1538 TTTTTTTTTTTTTTTTTTTTTTTTTTTTTTTTGTAGGCGGAGTCTCGCTCTGTGCGCCAGGCTGGAGTACACTGGTGCATCTCGGCTCACTGCAA  
-1447 GCTCCGCTCCCGGTTTCATGCCATTCTCTGCTCAGCCTCCGGAGTAGCTGGGACTACAGGCGCCGCCACCACGCCCGGCTACTTTT  
-1357 TTGCAITTTTTAGTAGAGA **CGGGTTTCA**CCGTGTCAGCCAGGATGGTCTCGATCTCTGATCTCGTGATCTGCCTGCCTCGGCTCCCA  
**NF-κB binding site 3**  
-1266 AAGTGCTGGGACTACAGCGGTGAGCCACCGCGCCGGCCCAAATGGAGGATTTAAAGCATGTGATAACTTACTCTGAGAAGAGCAG  
-1178 GGACCAGCATTA AAAACTA **TGACTCA**GCTGAGTTTCAAAGCACTCAAGTAAGCATC **CTCTGGTAA**GGAAATTAGTCAGATTCAAAT  
**AP-1 binding site 2** **STAT3 binding site 2**  
-1088 GAGAGACTAGTCAGAAAAAAGCAAAAACAAAACCTGCTTCTGACATTATTAATTTCCAAACTATCTAGATCTATCATATACATA  
-997 AAACATCATTGAGCACTGTGGAATAGGTATCTCTCACTAAAGGAATGGTCATTGTCAGCAAAGTTTGCAGTACA **GAGACTTTCCAT**  
**NF-κB binding site 2**  
-907 CAAATCAATCTTATTCTCCATTGATTTCCATTACAAAATCCAAGATGCAITCTGCTGTTAAATCCCATTAAGTCAACCAAGCCCTTTGG  
-815 AAATGGCACTTTTAAAAGAAAATGATAATATTCTGATAAAACATTGAGAGTGATATTTAACATATTAATAATTACACTGTTGTATTCAACAT  
-722 GTCACAACAAAAATGCTTAGGTTGAAACACAACACTCTTACAAAATTTGCCTCACATGCCACAAAAGCTAAGAATCTCTAAAACATTA  
-633 GCAACTTGATTTCTCACTGGCTTCACACTATCTGGGCATTGCGTCAITGCACAGCAAAATTAATCTTTTTACTATTTTTAAATTTTTT  
-540 CTCATTTCTACTGGCTTC **TTTTCCAAAAT**CTTTGTCCAGAGACCCCTGAATAGCTTGTGATGCTATTCTTAGATGGGAAAAATCATCCAAAT  
**STAT3 binding site 1**  
-448 CAGTTCAATCATAGCAGCTTATCTAGTGTGC **TGGGATCTCC**CTACCAATTGGAGAACTGGGCATCTCCTGAAAAGCAGTGTGGCAA  
**NF-κB binding site 1**  
-358 AGGGAAGCAGTAGATCTGATGAAGTTGGACTAGACACTTCAAATGCCTTTTCTAACTTCTGAGACACAGTACTACTCTCTCAGAAATTG  
-268 ATATTGGTAATATGCTGTGTTTACCATTTTATTTCAACCTAAGTCCTTTGCATAATATATGTTAAATGACTGGTTACATAATATATGTTGAA  
-173 **TGACTGA**TTGAATTCAAATGATGATTTGTCTTCATAGAGGATACTGACACTTTAGGTGCTGACAGCTCAAGCTAGAAAAGTGACTACTA  
**AP-1 binding site 1**  
-82 ATATTTATCTCCACAGGAATCTGTAAACACAGGTCATAATGACATTCAAAGTCCAACATCTAAGGTTGGACAGAGCATTCT **TGACAGTGA**  
**Transcription starting site (nucleotide+1)**  
+10 ACTTTTGTCTGGACTTGTGAATTCCTTACCTTTATCATGATGGTAGGTGAATTTTGTAAAGCAATAGATCACCTGAGTTAGAAGGAAGCAG  
+101 CAAATTGCTCTCTGGGTCACAGCCATAACTCACAATCTACCAGGTCCTCTTTTATCCATTTTGTATGACCCCTTGAATGTAAGATGTA  
+193 ACATTCAGGGTTGGCTTTGGCATTATTTAAAATAAATGTTTTGTAAACTGTAATATGCCACAGAATTCTAAAAGCTAGTGGCAAGAT  
+285 TGGGATGCTCTCTGAAGAAGATAATAAGAGTTCTTGGTTAATTCACCCGAGAC

## Figure S10

The sequence of the *KLF7* promoter. The NF- $\kappa$ B binding sites are highlighted in yellow, the AP-1 binding sites are highlighted in blue, the STAT3 binding sites are highlighted in green, and the transcription start site is marked in red.

**Figure S11**

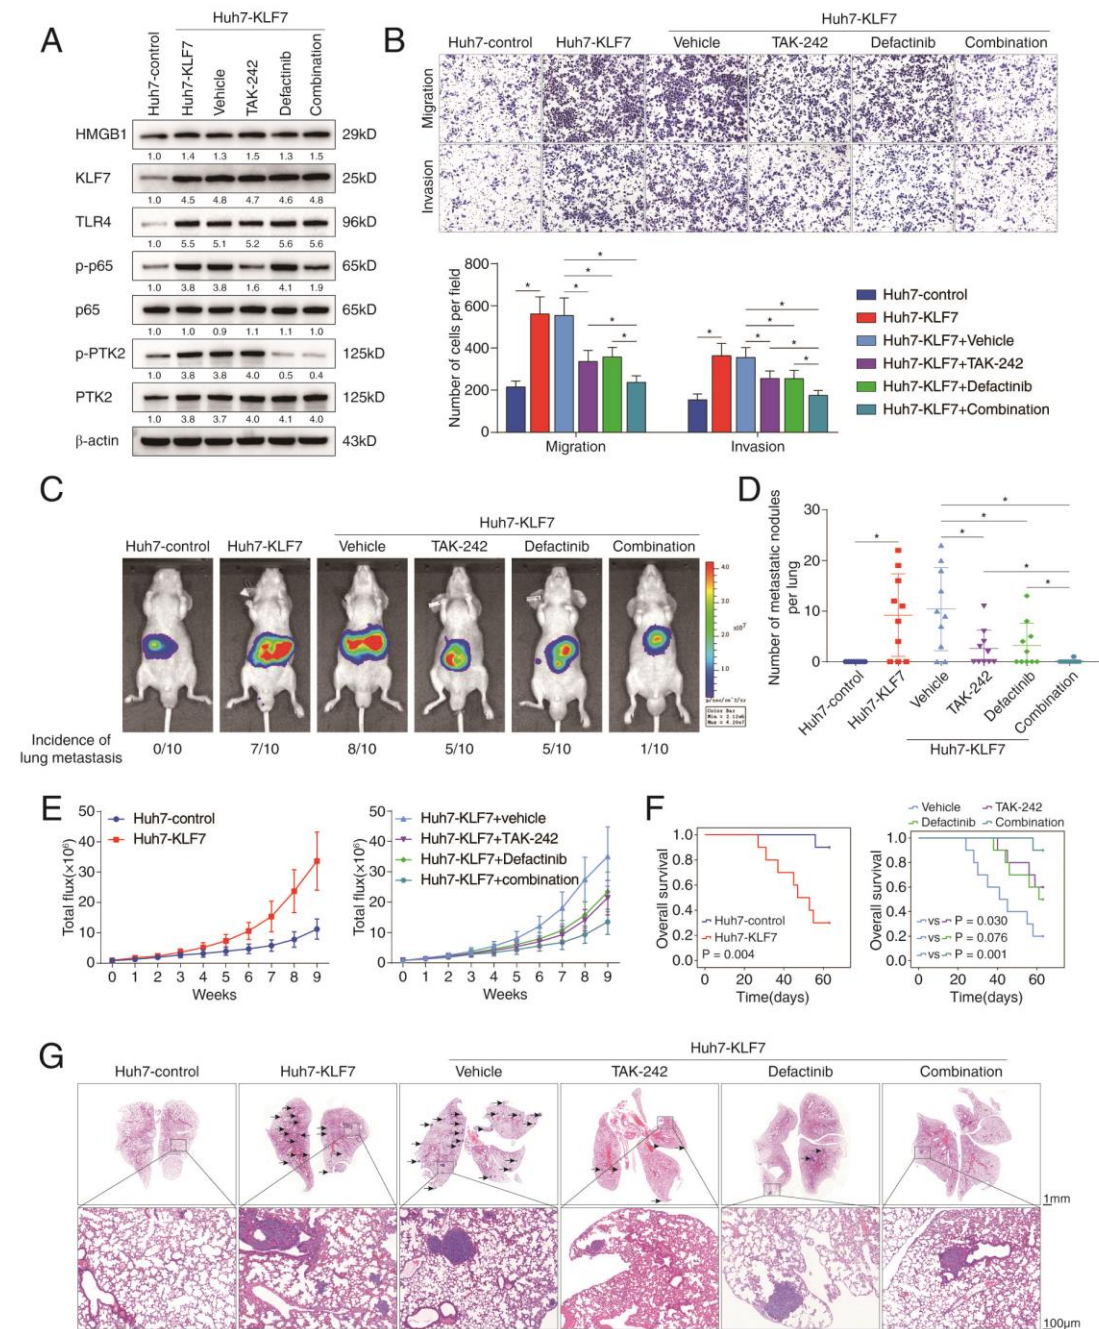

**Figure S11.** Combined administration of TLR4 and PTK2 inhibitors suppresses KLF7-mediated HCC metastasis.

(A) Lentivirus infection was used to upregulate KLF7 in Huh7 cells, Huh7-KLF7 cells were then incubated with vehicle, TAK-242, defactinib, or a combination of both. The protein levels of HMGB1, KLF7, TLR4, p-p65, p65, p-PTK2, and PTK2 were then

detected.

(B) Transwell analysis of the mobility of Huh7 cells, Huh7-KLF7 cells, and Huh7-KLF7 cells treated with TAK-242 alone, defactinib alone, or a combination of both.

(C-G) Combined blockade of TLR4 and PTK2 alleviated KLF7-mediated HCC metastasis. (C) Representative bioluminescent pictures of liver tumors in nude mice and the rates of lung metastasis. (D) The amount of pulmonary metastatic nodules.

(E) Intensity of bioluminescent signals of liver tumors. (F) Overall survival of mice. (G) Representative pictures of H&E staining of lung tissues.

\*P < 0.05.



**Table S1.** Correlation between KLF7 expression and clinicopathological characteristics of HCCs in two independent cohorts of human HCC tissues

| Clinicopathological variables | Cohort I              |                    |                   | Cohort II             |                    |                   |       |
|-------------------------------|-----------------------|--------------------|-------------------|-----------------------|--------------------|-------------------|-------|
|                               | Tumor KLF7 expression |                    | <i>P</i><br>Value | Tumor KLF7 expression |                    | <i>P</i><br>Value |       |
|                               | Negative<br>(n=93)    | Positive<br>(n=84) |                   | Negative<br>(n=66)    | Positive<br>(n=52) |                   |       |
| Age                           | 52.15(12.31)          | 50.89(11.90)       | 0.492             | 54.91(10.77)          | 53.08(9.94)        | 0.345             |       |
| Sex                           | female                | 19                 | 16                | 0.852                 | 17                 | 9                 | 0.371 |
|                               | male                  | 74                 | 68                |                       | 49                 | 43                |       |
| Serum AFP                     | ≤20ng/mL              | 25                 | 18                | 0.483                 | 18                 | 13                | 0.835 |
|                               | >20ng/mL              | 68                 | 66                |                       | 48                 | 39                |       |
| Virus infection               | HBV                   | 67                 | 61                | 0.890                 | 47                 | 35                | 0.674 |
|                               | HCV                   | 7                  | 7                 |                       | 8                  | 5                 |       |
|                               | HBV+HCV               | 6                  | 7                 |                       | 2                  | 4                 |       |
|                               | none                  | 13                 | 9                 |                       | 9                  | 8                 |       |
| Cirrhosis                     | absent                | 25                 | 17                | 0.377                 | 22                 | 19                | 0.846 |
|                               | present               | 68                 | 67                |                       | 44                 | 33                |       |
| Child-pugh score              | Class A               | 77                 | 60                | 0.075                 | 49                 | 39                | 1.000 |
|                               | Class B               | 16                 | 24                |                       | 17                 | 13                |       |
| Tumor number                  | single                | 67                 | 38                | <0.001                | 47                 | 27                | 0.036 |
|                               | multiple              | 26                 | 46                |                       | 19                 | 25                |       |
| Maximal tumor size            | ≤5cm                  | 56                 | 39                | 0.072                 | 42                 | 23                | 0.042 |
|                               | >5cm                  | 37                 | 45                |                       | 24                 | 29                |       |
| Tumor encapsulation           | absent                | 31                 | 44                | 0.015                 | 18                 | 25                | 0.022 |
|                               | present               | 62                 | 40                |                       | 48                 | 27                |       |
| Microvascular invasion        | absent                | 61                 | 34                | 0.001                 | 45                 | 20                | 0.002 |
|                               | present               | 32                 | 50                |                       | 21                 | 32                |       |
| Tumor differentiation         | I-II                  | 74                 | 38                | <0.001                | 54                 | 32                | 0.021 |
|                               | III-IV                | 19                 | 46                |                       | 12                 | 20                |       |
| TNM stage                     | I-II                  | 72                 | 47                | 0.004                 | 53                 | 32                | 0.038 |
|                               | III                   | 21                 | 37                |                       | 13                 | 20                |       |

**Table S2.** Univariate and multivariate analysis of factors associated with survival and recurrence in two independent cohorts of human HCC

| Clinical Variables                             | Time To Recurrence |                | Overall Survival   |                |
|------------------------------------------------|--------------------|----------------|--------------------|----------------|
|                                                | HR( 95% CI )       | <i>P</i> value | HR(95% CI)         | <i>P</i> value |
| <b>Cohort I (n = 177)</b>                      |                    |                |                    |                |
| <b>Univariate analysis</b>                     |                    |                |                    |                |
| Age                                            | 1.005(0.991-1.020) | 0.476          | 1.007(0.992-1.022) | 0.371          |
| Sex (female versus male)                       | 0.952(0.618-1.465) | 0.823          | 0.956(0.612-1.494) | 0.844          |
| Serum AFP (≤20 versus >20 ng/ml)               | 0.791(0.520-1.203) | 0.273          | 0.750(0.483-1.164) | 0.200          |
| HBV infection (no versus yes)                  | 0.832(0.537-1.289) | 0.410          | 0.688(0.426-1.112) | 0.127          |
| Cirrhosis ( absent versus present)             | 0.783(0.511-1.198) | 0.259          | 0.814(0.527-1.255) | 0.351          |
| Child-pugh score (A versus B)                  | 0.781(0.523-1.167) | 0.228          | 0.740(0.494-1.108) | 0.144          |
| Tumor number (single versus multiple)          | 0.508(0.357-0.722) | < 0.001        | 0.463(0.324-0.662) | < 0.001        |
| Maximal tumor size (≤5 versus >5 cm)           | 0.701(0.494-0.993) | 0.046          | 0.663(0.465-0.946) | 0.023          |
| Tumor encapsulation (absent versus present)    | 2.238(1.575-3.181) | < 0.001        | 2.321(1.621-3.324) | < 0.001        |
| Microvascular invasion (absent versus present) | 0.454(0.318-0.648) | < 0.001        | 0.451(0.314-0.648) | < 0.001        |
| Tumor differentiation (I-II versus III-IV)     | 0.422(0.297-0.601) | < 0.001        | 0.418(0.292-0.598) | < 0.001        |
| TNM stage (I-II versus III)                    | 0.340(0.237-0.486) | < 0.001        | 0.314(0.218-0.454) | < 0.001        |
| KLF7 (negative versus positive)                | 0.392(0.275-0.559) | < 0.001        | 0.394(0.275-0.567) | < 0.001        |
| TLR4 (negative versus positive)                | 0.434(0.305-0.617) | < 0.001        | 0.423(0.295-0.606) | < 0.001        |
| PTK2 (negative versus positive)                | 0.369(0.256-0.530) | < 0.001        | 0.347(0.238-0.504) | < 0.001        |
| Cytoplasmic HMGB1 (negative versus positive)   | 0.441(0.310-0.627) | < 0.001        | 0.438(0.306-0.)    | < 0.001        |
| <b>Multivariate analysis (KLF7)</b>            |                    |                |                    |                |
| Tumor number (single versus multiple)          | 0.857(0.572-1.284) | 0.454          | 0.742(0.498-1.106) | 0.143          |
| Maximal tumor size (≤5 versus >5 cm)           | 0.864(0.601-1.242) | 0.431          | 0.829(0.571-1.202) | 0.321          |
| Tumor encapsulation (absent versus present)    | 1.496(1.018-2.199) | 0.040          | 1.502(1.014-2.224) | 0.042          |
| Microvascular invasion (absent versus present) | 0.650(0.439-0.963) | 0.032          | 0.635(0.426-0.949) | 0.027          |
| Tumor differentiation (I-II versus III-IV)     | 0.713(0.481-1.057) | 0.092          | 0.736(0.492-1.100) | 0.135          |
| TNM stage (I-II versus III)                    | 0.517(0.339-0.789) | 0.002          | 0.474(0.313-0.718) | < 0.001        |
| KLF7 (negative versus positive)                | 0.609(0.407-0.913) | 0.016          | 0.654(0.431-0.990) | 0.045          |
| <b>Multivariate analysis (TLR4)</b>            |                    |                |                    |                |
| Tumor number (single versus multiple)          | 0.841(0.561-1.262) | 0.404          | 0.738(0.494-1.103) | 0.138          |
| Maximal tumor size (≤5 versus >5 cm)           | 0.854(0.592-1.231) | 0.397          | 0.827(0.569-1.201) | 0.318          |
| Tumor encapsulation (absent versus present)    | 1.402(0.943-2.084) | 0.095          | 1.386(0.922-2.085) | 0.116          |

|                                                |                    |       |                    |       |
|------------------------------------------------|--------------------|-------|--------------------|-------|
| Microvascular invasion (absent versus present) | 0.633(0.429-0.934) | 0.021 | 0.623(0.419-0.927) | 0.019 |
| Tumor differentiation (I-II versus III-IV)     | 0.654(0.444-0.964) | 0.032 | 0.674(0.453-1.002) | 0.051 |
| TNM stage (I-II versus III)                    | 0.523(0.338-0.809) | 0.004 | 0.485(0.316-0.744) | 0.001 |
| TLR4 (negative versus positive)                | 0.594(0.405-0.871) | 0.008 | 0.588(0.397-0.871) | 0.008 |

#### **Multivariate analysis (PTK2)**

|                                                |                    |         |                    |         |
|------------------------------------------------|--------------------|---------|--------------------|---------|
| Tumor number (single versus multiple)          | 1.054(0.682-1.628) | 0.814   | 0.879(0.578-1.336) | 0.545   |
| Maximal tumor size ( $\leq 5$ versus $> 5$ cm) | 0.814(0.566-1.171) | 0.267   | 0.771(0.531-1.119) | 0.171   |
| Tumor encapsulation (absent versus present)    | 1.546(1.054-2.268) | 0.026   | 1.565(1.058-2.315) | 0.025   |
| Microvascular invasion (absent versus present) | 0.655(0.446-0.964) | 0.032   | 0.651(0.439-0.966) | 0.033   |
| Tumor differentiation (I-II versus III-IV)     | 0.629(0.427-0.925) | 0.018   | 0.655(0.441-0.973) | 0.036   |
| TNM stage (I-II versus III)                    | 0.543(0.353-0.835) | 0.005   | 0.525(0.343-0.804) | 0.003   |
| PTK2 (negative versus positive)                | 0.461(0.305-0.696) | < 0.001 | 0.463(0.305-0.703) | < 0.001 |

#### **Multivariate analysis (Cytoplasmic HMGB1)**

|                                                |                    |       |                    |         |
|------------------------------------------------|--------------------|-------|--------------------|---------|
| Tumor number (single versus multiple)          | 0.818(0.551-1.213) | 0.317 | 0.723(0.488-1.070) | 0.105   |
| Maximal tumor size ( $\leq 5$ versus $> 5$ cm) | 0.832(0.578-1.198) | 0.323 | 0.785(0.542-1.138) | 0.201   |
| Tumor encapsulation (absent versus present)    | 1.423(0.966-2.098) | 0.075 | 1.433(0.964-2.130) | 0.076   |
| Microvascular invasion (absent versus present) | 0.620(0.422-0.912) | 0.015 | 0.604(0.408-0.893) | 0.012   |
| Tumor differentiation (I-II versus III-IV)     | 0.685(0.465-1.008) | 0.055 | 0.694(0.469-1.029) | 0.069   |
| TNM stage (I-II versus III)                    | 0.491(0.320-0.751) | 0.001 | 0.460(0.301-0.702) | < 0.001 |
| Cytoplasmic HMGB1 (negative versus positive)   | 0.583(0.402-0.845) | 0.004 | 0.576(0.395-0.840) | 0.004   |

#### **Cohort II (n = 118)**

##### **Univariate analysis**

|                                                |                    |         |                    |         |
|------------------------------------------------|--------------------|---------|--------------------|---------|
| Age                                            | 0.994(0.974-1.015) | 0.588   | 0.994(0.974-1.015) | 0.578   |
| Sex (female versus male)                       | 0.879(0.520-1.485) | 0.630   | 0.884(0.523-1.495) | 0.646   |
| Serum AFP ( $\leq 20$ versus $> 20$ ng/ml)     | 0.730(0.440-1.210) | 0.222   | 0.740(0.446-1.229) | 0.245   |
| HBV infection (no versus yes)                  | 0.731(0.432-1.236) | 0.242   | 0.679(0.397-1.162) | 0.158   |
| Cirrhosis (absent versus present)              | 0.746(0.467-1.190) | 0.218   | 0.697(0.434-1.120) | 0.136   |
| Child-pugh score (A versus B)                  | 0.817(0.506-1.318) | 0.407   | 0.783(0.485-1.265) | 0.317   |
| Tumor number (single versus multiple)          | 0.372(0.238-0.580) | < 0.001 | 0.360(0.230-0.563) | < 0.001 |
| Maximal tumor size ( $\leq 5$ versus $> 5$ cm) | 0.575(0.370-0.893) | 0.014   | 0.575(0.369-0.897) | 0.015   |
| Tumor encapsulation (absent versus present)    | 2.192(1.406-3.418) | 0.001   | 2.187(1.400-3.418) | 0.001   |
| Microvascular invasion (absent versus present) | 0.372(0.238-0.581) | < 0.001 | 0.365(0.233-0.571) | < 0.001 |
| Tumor differentiation (I-II versus III-IV)     | 0.231(0.145-0.371) | < 0.001 | 0.227(0.142-0.364) | < 0.001 |

|                                                  |                    |         |                    |         |
|--------------------------------------------------|--------------------|---------|--------------------|---------|
| TNM stage (I-II versus III)                      | 0.297(0.187-0.473) | < 0.001 | 0.298(0.187-0.474) | < 0.001 |
| KLF7 (negative versus positive)                  | 0.418(0.269-0.650) | < 0.001 | 0.423(0.271-0.658) | < 0.001 |
| TLR4 (negative versus positive)                  | 0.425(0.273-0.660) | < 0.001 | 0.411(0.264-0.641) | < 0.001 |
| PTK2 (negative versus positive)                  | 0.457(0.290-0.720) | 0.001   | 0.438(0.277-0.694) | < 0.001 |
| Cytoplasmic HMGB1 (negative versus positive)     | 0.349(0.224-0.544) | < 0.001 | 0.343(0.220-0.537) | < 0.001 |
| <b>Multivariate analysis (KLF7)</b>              |                    |         |                    |         |
| Tumor number (single versus multiple)            | 0.532(0.331-0.853) | 0.009   | 0.526(0.327-0.847) | 0.008   |
| Maximal tumor size ( $\leq 5$ versus $> 5$ cm)   | 0.768(0.478-1.233) | 0.274   | 0.744(0.461-1.201) | 0.226   |
| Tumor encapsulation (absent versus present)      | 1.102(0.660-1.840) | 0.710   | 1.079(0.644-1.808) | 0.772   |
| Microvascular invasion (absent versus present)   | 0.570(0.350-0.928) | 0.024   | 0.552(0.337-0.905) | 0.018   |
| Tumor differentiation (I-II versus III-IV)       | 0.351(0.205-0.603) | < 0.001 | 0.350(0.203-0.603) | < 0.001 |
| TNM stage (I-II versus III)                      | 0.394(0.238-0.650) | < 0.001 | 0.408(0.245-0.678) | 0.001   |
| KLF7 (negative versus positive)                  | 0.614(0.387-0.973) | 0.038   | 0.627(0.393-0.998) | 0.049   |
| <b>Multivariate analysis (TLR4)</b>              |                    |         |                    |         |
| Tumor number (single versus multiple)            | 0.489(0.305-0.782) | 0.003   | 0.486(0.303-0.779) | 0.003   |
| Maximal tumor size ( $\leq 5$ versus $> 5$ cm)   | 0.702(0.441-1.116) | 0.134   | 0.669(0.420-1.065) | 0.090   |
| Tumor encapsulation (absent versus present)      | 1.056(0.642-1.739) | 0.829   | 1.027(0.621-1.698) | 0.918   |
| Microvascular invasion (absent versus present)   | 0.571(0.351-0.931) | 0.025   | 0.560(0.342-0.917) | 0.021   |
| Tumor differentiation (I-II versus III-IV)       | 0.388(0.225-0.669) | 0.001   | 0.386(0.224-0.666) | 0.001   |
| TNM stage (I-II versus III)                      | 0.417(0.250-0.694) | 0.001   | 0.434(0.259-0.726) | 0.002   |
| TLR4 (negative versus positive)                  | 0.681(0.422-1.101) | 0.117   | 0.652(0.402-1.057) | 0.083   |
| <b>Multivariate analysis (PTK2)</b>              |                    |         |                    |         |
| Tumor number (single versus multiple)            | 0.500(0.313-0.800) | 0.004   | 0.498(0.311-0.799) | 0.004   |
| Maximal tumor size ( $\leq 5$ versus $> 5$ cm)   | 0.721(0.455-1.142) | 0.163   | 0.686(0.432-1.089) | 0.110   |
| Tumor encapsulation (absent versus present)      | 1.024(0.614-1.707) | 0.929   | 0.994(0.593-1.666) | 0.982   |
| Microvascular invasion (absent versus present)   | 0.540(0.334-0.872) | 0.012   | 0.525(0.324-0.853) | 0.009   |
| Tumor differentiation (I-II versus III-IV)       | 0.389(0.221-0.682) | 0.001   | 0.390(0.222-0.685) | 0.001   |
| TNM stage (I-II versus III)                      | 0.383(0.230-0.638) | < 0.001 | 0.396(0.237-0.664) | < 0.001 |
| PTK2 (negative versus positive)                  | 0.768(0.461-1.281) | 0.312   | 0.743(0.444-1.242) | 0.257   |
| <b>Multivariate analysis (Cytoplasmic HMGB1)</b> |                    |         |                    |         |
| Tumor number (single versus multiple)            | 0.561(0.350-0.899) | 0.016   | 0.552(0.344-0.886) | 0.014   |
| Maximal tumor size ( $\leq 5$ versus $> 5$ cm)   | 0.707(0.441-1.134) | 0.151   | 0.675(0.421-1.084) | 0.104   |
| Tumor encapsulation (absent versus present)      | 1.061(0.634-1.777) | 0.822   | 1.051(0.626-1.764) | 0.851   |
| Microvascular invasion (absent versus present)   | 0.583(0.357-0.951) | 0.031   | 0.558(0.340-0.917) | 0.021   |

|                                              |                    |         |                    |         |
|----------------------------------------------|--------------------|---------|--------------------|---------|
| Tumor differentiation (I-II versus III-IV)   | 0.466(0.264-0.821) | 0.008   | 0.475(0.269-0.840) | 0.011   |
| TNM stage (I-II versus III)                  | 0.307(0.179-0.529) | < 0.001 | 0.317(0.183-0.549) | < 0.001 |
| Cytoplasmic HMGB1 (negative versus positive) | 0.448(0.267-0.751) | 0.002   | 0.446(0.265-0.749) | 0.002   |

---

**Table S3.** List of genes differentially expressed in PLC/PRF/5-KLF7 versus PLC/PRF/5-control cells using a human liver cancer PCR array

| gene      | Fold change | Description                                                                                              |
|-----------|-------------|----------------------------------------------------------------------------------------------------------|
| TLR4      | 7.31        | Toll-like receptor 4                                                                                     |
| PTK2      | 6.82        | PTK2 protein tyrosine kinase 2                                                                           |
| TCF4      | 5.27        | Transcription factor 4                                                                                   |
| ITGB1     | 4.73        | Integrin, beta 1 (fibronectin receptor, beta polypeptide, antigen CD29 includes MDF2, MSK12)             |
| FZD7      | 4.29        | Frizzled family receptor 7                                                                               |
| ADAM17    | 4.07        | ADAM metallopeptidase domain 17                                                                          |
| RAC1      | 3.86        | Ras-related C3 botulinum toxin substrate 1 (rho family, small GTP binding protein Rac1)                  |
| XIAP      | 3.62        | X-linked inhibitor of apoptosis                                                                          |
| BCL2      | 3.37        | B-cell CLL/lymphoma 2                                                                                    |
| CCL5      | 3.03        | Chemokine (C-C motif) ligand 5                                                                           |
| MCL1      | 2.66        | Myeloid cell leukemia sequence 1 (BCL2-related)                                                          |
| NRAS      | 2.41        | Neuroblastoma RAS viral (v-ras) oncogene homolog                                                         |
| YAP1      | 2.24        | Yes-associated protein 1                                                                                 |
| TGFA      | 2.09        | Transforming growth factor, alpha                                                                        |
| TNFRSF10B | 1.98        | Tumor necrosis factor receptor superfamily, member 10b                                                   |
| VEGFA     | 1.96        | Vascular endothelial growth factor A                                                                     |
| KDR       | 1.91        | Kinase insert domain receptor (a type III receptor tyrosine kinase)                                      |
| TGFBR2    | 1.89        | Transforming growth factor, beta receptor II (70/80kDa)                                                  |
| E2F1      | 1.86        | E2F transcription factor 1                                                                               |
| RHOA      | 1.76        | Ras homolog gene family, member A                                                                        |
| HGF       | 1.65        | Hepatocyte growth factor (hepapoietin A; scatter factor)                                                 |
| CXCR4     | 1.56        | Chemokine (C-X-C motif) receptor 4                                                                       |
| TGFB1     | 1.51        | Transforming growth factor, beta 1                                                                       |
| IRS1      | 1.49        | Insulin receptor substrate 1                                                                             |
| IGF2      | 1.46        | Insulin-like growth factor 2 (somatomedin A)                                                             |
| STAT3     | 1.45        | Signal transducer and activator of transcription 3 (acute-phase response factor)                         |
| CCND2     | 1.42        | Cyclin D2                                                                                                |
| EGF       | 1.39        | Epidermal growth factor                                                                                  |
| LEF1      | 1.37        | Lymphoid enhancer-binding factor 1                                                                       |
| FLT1      | 1.35        | Fms-related tyrosine kinase 1 (vascular endothelial growth factor/vascular permeability factor receptor) |
| SMAD4     | 1.33        | SMAD family member 4                                                                                     |
| MET       | 1.32        | Met proto-oncogene (hepatocyte growth factor receptor)                                                   |
| CTNNB1    | 1.32        | Catenin (cadherin-associated protein), beta 1, 88kDa                                                     |
| AKT1      | 1.29        | V-akt murine thymoma viral oncogene homolog 1                                                            |

|         |       |                                                                                       |
|---------|-------|---------------------------------------------------------------------------------------|
| IGFBP3  | 1.28  | Insulin-like growth factor binding protein 3                                          |
| TERT    | 1.28  | Telomerase reverse transcriptase                                                      |
| EGFR    | 1.27  | Epidermal growth factor receptor                                                      |
| PDGFRA  | 1.25  | Platelet-derived growth factor receptor, alpha polypeptide                            |
| PTGS2   | 1.25  | Prostaglandin-endoperoxide synthase 2 (prostaglandin G/H synthase and cyclooxygenase) |
| ANGPT2  | 1.24  | Angiopoietin 2                                                                        |
| EP300   | 1.21  | E1A binding protein p300                                                              |
| MYC     | 1.21  | V-myc myelocytomatosis viral oncogene homolog (avian)                                 |
| SMAD7   | 1.20  | SMAD family member 7                                                                  |
| TNFSF10 | 1.18  | Tumor necrosis factor (ligand) superfamily, member 10                                 |
| IGFBP1  | 1.17  | Insulin-like growth factor binding protein 1                                          |
| NFKB1   | 1.15  | Nuclear factor of kappa light polypeptide gene enhancer in B-cells 1                  |
| MTDH    | 1.12  | Metadherin                                                                            |
| BIRC2   | 1.12  | Baculoviral IAP repeat containing 2                                                   |
| CCND1   | 1.10  | Cyclin D1                                                                             |
| HRAS    | 1.08  | V-Ha-ras Harvey rat sarcoma viral oncogene homolog                                    |
| HHIP    | 1.06  | Hedgehog interacting protein                                                          |
| SFRP2   | 1.05  | Secreted frizzled-related protein 2                                                   |
| PYCARD  | 1.03  | PYD and CARD domain containing                                                        |
| GSTP1   | 1.01  | Glutathione S-transferase pi 1                                                        |
| GADD45B | -1.03 | Growth arrest and DNA-damage-inducible, beta                                          |
| CDH13   | -1.03 | Cadherin 13, H-cadherin (heart)                                                       |
| FHIT    | -1.05 | Fragile histidine triad gene                                                          |
| WT1     | -1.07 | Wilms tumor 1                                                                         |
| RUNX3   | -1.09 | Runt-related transcription factor 3                                                   |
| BCL2L1  | -1.12 | BCL2-like 1                                                                           |
| RASSF1  | -1.17 | Ras association (RalGDS/AF-6) domain family member 1                                  |
| FAS     | -1.18 | Fas (TNF receptor superfamily, member 6)                                              |
| BID     | -1.23 | BH3 interacting domain death agonist                                                  |
| BIRC5   | -1.25 | Baculoviral IAP repeat containing 5                                                   |
| FADD    | -1.26 | Fas (TNFRSF6)-associated via death domain                                             |
| PIN1    | -1.29 | Peptidylprolyl cis/trans isomerase, NIMA-interacting 1                                |
| DLC1    | -1.32 | Deleted in liver cancer 1                                                             |
| OPCML   | -1.33 | Opioid binding protein/cell adhesion molecule-like                                    |
| CDKN2A  | -1.40 | Cyclin-dependent kinase inhibitor 2A (melanoma, p16, inhibits CDK4)                   |
| MSH2    | -1.44 | MutS homolog 2, colon cancer, nonpolyposis type 1 (E. coli)                           |
| RB1     | -1.47 | Retinoblastoma 1                                                                      |
| PTEN    | -1.53 | Phosphatase and tensin homolog                                                        |
| SOCS1   | -1.64 | Suppressor of cytokine signaling 1                                                    |
| TP53    | -1.67 | Tumor protein p53                                                                     |
| DAB2IP  | -1.75 | DAB2 interacting protein                                                              |

|        |       |                                                  |
|--------|-------|--------------------------------------------------|
| CDH1   | -1.88 | Cadherin 1, type 1, E-cadherin (epithelial)      |
| CDKN1A | -1.97 | Cyclin-dependent kinase inhibitor 1A (p21, Cip1) |
| BAX    | -2.06 | BCL2-associated X protein                        |
| SOCS3  | -2.10 | Suppressor of cytokine signaling 3               |
| CFLAR  | -2.19 | CASP8 and FADD-like apoptosis regulator          |
| RELN   | -2.31 | Reelin                                           |
| MSH3   | -2.54 | MutS homolog 3 (E. coli)                         |
| CASP8  | -2.93 | Caspase 8, apoptosis-related cysteine peptidase  |
| CDKN1B | -3.27 | Cyclin-dependent kinase inhibitor 1B (p27, Kip1) |

---



**Table S4.** Correlation between TLR4 expression and clinicopathological characteristics of HCCs in two independent cohorts of human HCC tissues

| Clinicopathological variables | Cohort I              |                    |                   | Cohort II             |                    |                   |       |
|-------------------------------|-----------------------|--------------------|-------------------|-----------------------|--------------------|-------------------|-------|
|                               | Tumor TLR4 expression |                    | <i>P</i><br>Value | Tumor TLR4 expression |                    | <i>P</i><br>Value |       |
|                               | Negative<br>(n=98)    | Positive<br>(n=79) |                   | Negative<br>(n=65)    | Positive<br>(n=53) |                   |       |
| Age                           | 50.92(11.94)          | 52.43(12.34)       | 0.438             | 53.06(9.57)           | 55.38(11.32)       | 0.231             |       |
| Sex                           | female                | 19                 | 16                | 1.000                 | 12                 | 14                | 0.373 |
|                               | male                  | 79                 | 63                |                       | 53                 | 39                |       |
| Serum AFP                     | ≤20ng/mL              | 22                 | 21                | 0.598                 | 19                 | 12                | 0.529 |
|                               | >20ng/mL              | 76                 | 58                |                       | 46                 | 41                |       |
| Virus infection               | HBV                   | 76                 | 52                | 0.239                 | 45                 | 37                | 0.957 |
|                               | HCV                   | 8                  | 6                 |                       | 8                  | 5                 |       |
|                               | HBV+HCV               | 5                  | 8                 |                       | 3                  | 3                 |       |
|                               | none                  | 9                  | 13                |                       | 9                  | 8                 |       |
| Cirrhosis                     | absent                | 22                 | 20                | 0.723                 | 25                 | 16                | 0.437 |
|                               | present               | 76                 | 59                |                       | 40                 | 37                |       |
| Child-pugh score              | Class A               | 74                 | 63                | 0.589                 | 49                 | 39                | 0.835 |
|                               | Class B               | 24                 | 16                |                       | 16                 | 14                |       |
| Tumor number                  | single                | 66                 | 39                | 0.021                 | 44                 | 30                | 0.253 |
|                               | multiple              | 32                 | 40                |                       | 21                 | 23                |       |
| Maximal tumor size            | ≤5cm                  | 56                 | 39                | 0.363                 | 40                 | 25                | 0.139 |
|                               | >5cm                  | 42                 | 40                |                       | 25                 | 28                |       |
| Tumor encapsulation           | absent                | 31                 | 44                | 0.001                 | 18                 | 25                | 0.035 |
|                               | present               | 67                 | 35                |                       | 47                 | 28                |       |
| Microvascular invasion        | absent                | 61                 | 34                | 0.015                 | 43                 | 22                | 0.009 |
|                               | present               | 37                 | 45                |                       | 22                 | 31                |       |
| Tumor differentiation         | I-II                  | 69                 | 43                | 0.041                 | 55                 | 31                | 0.002 |
|                               | III-IV                | 29                 | 36                |                       | 10                 | 22                |       |
| TNM stage                     | I-II                  | 76                 | 43                | 0.001                 | 55                 | 30                | 0.001 |
|                               | III                   | 22                 | 36                |                       | 10                 | 23                |       |

**Table S5.** Correlation between PTK2 expression and clinicopathological characteristics of HCCs in two independent cohorts of human HCC tissues

| Clinicopathological variables | Cohort I              |                    |                   | Cohort II             |                    |                   |        |
|-------------------------------|-----------------------|--------------------|-------------------|-----------------------|--------------------|-------------------|--------|
|                               | Tumor PTK2 expression |                    | <i>P</i><br>Value | Tumor PTK2 expression |                    | <i>P</i><br>Value |        |
|                               | Negative<br>(n=85)    | Positive<br>(n=92) |                   | Negative<br>(n=55)    | Positive<br>(n=63) |                   |        |
| Age                           | 51.14(11.89)          | 51.93(12.35)       | 0.664             | 54.55(10.05)          | 53.71(10.78)       | 0.667             |        |
| Sex                           | female                | 19                 | 16                | 0.453                 | 15                 | 11                | 0.266  |
|                               | male                  | 66                 | 76                |                       | 40                 | 52                |        |
| Serum AFP                     | ≤20ng/mL              | 21                 | 22                | 1.000                 | 14                 | 17                | 1.000  |
|                               | >20ng/mL              | 64                 | 70                |                       | 41                 | 46                |        |
| Virus infection               | HBV                   | 62                 | 66                | 0.942                 | 38                 | 44                | 0.193  |
|                               | HCV                   | 6                  | 8                 |                       | 9                  | 4                 |        |
|                               | HBV+HCV               | 7                  | 6                 |                       | 3                  | 3                 |        |
|                               | none                  | 10                 | 12                |                       | 5                  | 12                |        |
| Cirrhosis                     | absent                | 19                 | 23                | 0.726                 | 19                 | 22                | 1.000  |
|                               | present               | 66                 | 69                |                       | 36                 | 41                |        |
| Child-pugh score              | Class A               | 68                 | 69                | 0.475                 | 42                 | 46                | 0.832  |
|                               | Class B               | 17                 | 23                |                       | 13                 | 17                |        |
| Tumor number                  | single                | 67                 | 38                | <0.001                | 41                 | 33                | 0.014  |
|                               | multiple              | 18                 | 54                |                       | 14                 | 30                |        |
| Maximal tumor size            | ≤5cm                  | 47                 | 48                | 0.763                 | 33                 | 32                | 0.357  |
|                               | >5cm                  | 38                 | 44                |                       | 22                 | 31                |        |
| Tumor encapsulation           | absent                | 29                 | 46                | 0.035                 | 13                 | 30                | 0.008  |
|                               | present               | 56                 | 46                |                       | 42                 | 33                |        |
| Microvascular invasion        | absent                | 57                 | 38                | 0.001                 | 39                 | 26                | 0.002  |
|                               | present               | 28                 | 54                |                       | 16                 | 37                |        |
| Tumor differentiation         | I-II                  | 63                 | 49                | 0.005                 | 50                 | 36                | <0.001 |
|                               | III-IV                | 22                 | 43                |                       | 5                  | 27                |        |
| TNM stage                     | I-II                  | 69                 | 50                | <0.001                | 45                 | 40                | 0.039  |
|                               | III                   | 16                 | 42                |                       | 10                 | 23                |        |

**Table S6.** Correlation between cytoplasmic HMGB1 expression and clinicopathological characteristics of HCCs in two independent cohorts of human HCC tissues

| Clinicopathological variables | Cohort I                           |                    |                   | Cohort II                          |                    |                   |       |
|-------------------------------|------------------------------------|--------------------|-------------------|------------------------------------|--------------------|-------------------|-------|
|                               | Tumor cytoplasmic HMGB1 expression |                    |                   | Tumor cytoplasmic HMGB1 expression |                    |                   |       |
|                               | Negative<br>(n=103)                | Positive<br>(n=74) | <i>P</i><br>Value | Negative<br>(n=68)                 | Positive<br>(n=50) | <i>P</i><br>Value |       |
| Age                           | 50.89(12.43)                       | 52.47(11.66)       | 0.393             | 54.28(11.13)                       | 53.86(9.46)        | 0.830             |       |
| Sex                           | female                             | 20                 | 15                | 1.000                              | 14                 | 12                | 0.661 |
|                               | male                               | 83                 | 59                |                                    | 54                 | 38                |       |
| Serum AFP                     | ≤20ng/mL                           | 23                 | 20                | 0.483                              | 20                 | 11                | 0.404 |
|                               | >20ng/mL                           | 80                 | 54                |                                    | 48                 | 39                |       |
| Virus infection               | HBV                                | 68                 | 60                | 0.178                              | 45                 | 37                | 0.200 |
|                               | HCV                                | 10                 | 4                 |                                    | 10                 | 3                 |       |
|                               | HBV+HCV                            | 9                  | 4                 |                                    | 5                  | 1                 |       |
|                               | none                               | 16                 | 6                 |                                    | 8                  | 9                 |       |
| Cirrhosis                     | absent                             | 26                 | 16                | 0.597                              | 25                 | 16                | 0.696 |
|                               | present                            | 77                 | 58                |                                    | 43                 | 34                |       |
| Child-pugh score              | Class A                            | 79                 | 58                | 0.857                              | 50                 | 38                | 0.832 |
|                               | Class B                            | 24                 | 16                |                                    | 18                 | 12                |       |
| Tumor number                  | single                             | 70                 | 35                | 0.008                              | 50                 | 24                | 0.007 |
|                               | multiple                           | 33                 | 39                |                                    | 18                 | 26                |       |
| Maximal tumor size            | ≤5cm                               | 59                 | 36                | 0.287                              | 39                 | 26                | 0.580 |
|                               | >5cm                               | 44                 | 38                |                                    | 29                 | 24                |       |
| Tumor encapsulation           | absent                             | 36                 | 39                | 0.021                              | 19                 | 24                | 0.033 |
|                               | present                            | 67                 | 35                |                                    | 49                 | 26                |       |
| Microvascular invasion        | absent                             | 64                 | 31                | 0.009                              | 44                 | 21                | 0.016 |
|                               | present                            | 39                 | 43                |                                    | 24                 | 29                |       |
| Tumor differentiation         | I-II                               | 72                 | 40                | 0.040                              | 58                 | 28                | 0.001 |
|                               | III-IV                             | 31                 | 34                |                                    | 10                 | 22                |       |
| TNM stage                     | I-II                               | 79                 | 40                | 0.002                              | 54                 | 31                | 0.041 |
|                               | III                                | 24                 | 34                |                                    | 14                 | 19                |       |

**Table S7.** Correlation between p-p65 expression and clinicopathological characteristics of HCCs in two independent cohorts of human HCC tissues

| Clinicopathological variables | Cohort I               |                    |                   | Cohort II              |                    |                   |       |
|-------------------------------|------------------------|--------------------|-------------------|------------------------|--------------------|-------------------|-------|
|                               | Tumor p-p65 expression |                    | <i>P</i><br>Value | Tumor p-p65 expression |                    | <i>P</i><br>Value |       |
|                               | Negative<br>(n=82)     | Positive<br>(n=95) |                   | Negative<br>(n=54)     | Positive<br>(n=64) |                   |       |
| Age                           | 51.27(12.55)           | 51.80(11.77)       | 0.772             | 55.11(9.47)            | 53.25(11.15)       | 0.336             |       |
| Sex                           | female                 | 16                 | 19                | 1.000                  | 13                 | 13                | 0.661 |
|                               | male                   | 66                 | 76                |                        | 41                 | 51                |       |
| Serum AFP                     | ≤20ng/mL               | 21                 | 22                | 0.728                  | 16                 | 15                | 0.530 |
|                               | >20ng/mL               | 61                 | 73                |                        | 38                 | 49                |       |
| Virus infection               | HBV                    | 60                 | 68                | 0.913                  | 38                 | 44                | 0.486 |
|                               | HCV                    | 6                  | 8                 |                        | 8                  | 5                 |       |
|                               | HBV+HCV                | 5                  | 8                 |                        | 2                  | 4                 |       |
|                               | none                   | 11                 | 11                |                        | 6                  | 11                |       |
| Cirrhosis                     | absent                 | 16                 | 26                | 0.288                  | 20                 | 21                | 0.700 |
|                               | present                | 66                 | 69                |                        | 34                 | 43                |       |
| Child-pugh score              | Class A                | 67                 | 70                | 0.214                  | 38                 | 50                | 0.398 |
|                               | Class B                | 15                 | 25                |                        | 16                 | 14                |       |
| Tumor number                  | single                 | 56                 | 49                | 0.032                  | 41                 | 33                | 0.008 |
|                               | multiple               | 26                 | 46                |                        | 13                 | 31                |       |
| Maximal tumor size            | ≤5cm                   | 51                 | 44                | 0.049                  | 36                 | 29                | 0.026 |
|                               | >5cm                   | 31                 | 51                |                        | 18                 | 35                |       |
| Tumor encapsulation           | absent                 | 25                 | 50                | 0.004                  | 12                 | 31                | 0.004 |
|                               | present                | 57                 | 45                |                        | 42                 | 33                |       |
| Microvascular invasion        | absent                 | 57                 | 38                | <0.001                 | 36                 | 29                | 0.026 |
|                               | present                | 25                 | 57                |                        | 18                 | 35                |       |
| Tumor differentiation         | I-II                   | 61                 | 51                | 0.005                  | 46                 | 40                | 0.007 |
|                               | III-IV                 | 21                 | 44                |                        | 8                  | 24                |       |
| TNM stage                     | I-II                   | 64                 | 55                | 0.006                  | 46                 | 39                | 0.004 |
|                               | III                    | 18                 | 40                |                        | 8                  | 25                |       |

**Table S8. Primer sequences used in the study**

| Primer name                                 | Primer sequences             | Enzyme |
|---------------------------------------------|------------------------------|--------|
| Primers for real-time PCR:                  |                              |        |
| <i>KLF1</i> sense:                          | 5'-GGTTGCGGCAAGAGCTACA-3'    |        |
| <i>KLF1</i> antisense:                      | 5'-GTCAGAGCGCGAAAAAGCAC-3'   |        |
| <i>KLF2</i> sense:                          | 5'-TTCGGTCTCTTCGACGACG-3'    |        |
| <i>KLF2</i> antisense:                      | 5'-TGCGAACTCTTGGTGTAGGTC-3'  |        |
| <i>KLF3</i> sense:                          | 5'-GCACGGAATACAGATGGAGCC-3'  |        |
| <i>KLF3</i> antisense:                      | 5'-TGTGAGGACGGGAACTTCAGA-3'  |        |
| <i>KLF4</i> sense:                          | 5'-CAGCTTCACCTATCCGATCCG-3'  |        |
| <i>KLF4</i> antisense:                      | 5'-GACTCCCTGCCATAGAGGAGG-3'  |        |
| <i>KLF5</i> sense:                          | 5'-CCTGGTCCAGACAAGATGTGA-3'  |        |
| <i>KLF5</i> antisense:                      | 5'-GAACTGGTCTACGACTGAGGC-3'  |        |
| <i>KLF6</i> sense:                          | 5'-TCTCATCAGCCCGAGCTTTTG-3'  |        |
| <i>KLF6</i> antisense:                      | 5'-GAGCTGTCAGAGGATTCGCT-3'   |        |
| <i>KLF7</i> sense                           | 5'-CTCGGCAGTGGACATCTTG-3'    |        |
| <i>KLF7</i> antisense                       | 5'-CACCAGTTTCAACGTCACCGT-3'  |        |
| <i>KLF8</i> sense                           | 5'-CCCAAGTGAACCAGTTGACC-3'   |        |
| <i>KLF8</i> antisense                       | 5'-GACGTGGACACCACAAGGG-3'    |        |
| <i>KLF9</i> sense                           | 5'-GCCGCCTACATGGACTTCG-3'    |        |
| <i>KLF9</i> antisense                       | 5'-GGATGGGTTCGGTACTTGTTC-3'  |        |
| <i>KLF10</i> sense                          | 5'-ACTGCCAAACCTCACATTGC-3'   |        |
| <i>KLF10</i> antisense                      | 5'-ACGAATCACACTTGTTCCTG-3'   |        |
| <i>KLF11</i> sense                          | 5'-GTTGCGGATAAGACCCCTCAC-3'  |        |
| <i>KLF11</i> antisense                      | 5'-TGGAATCTGTTACTTGGGGAGA-3' |        |
| <i>KLF12</i> sense                          | 5'-CCCCGGAGGACTCGTTATCT-3'   |        |
| <i>KLF12</i> antisense                      | 5'-GGGAGGATGAAACGGCAGTAG-3'  |        |
| <i>KLF13</i> sense                          | 5'-CGGCCTCAGACAAAGGGTC-3'    |        |
| <i>KLF13</i> antisense                      | 5'-TTCCCGTAAACTTTCTCGCAG-3'  |        |
| <i>KLF14</i> sense                          | 5'-TTACAAGTCGTCCACCTCAA-3'   |        |
| <i>KLF14</i> antisense                      | 5'-TCTGGATGATAGGTTGGGTGG-3'  |        |
| <i>KLF15</i> sense                          | 5'-TTCTCGTCGCCAAAATGCC-3'    |        |
| <i>KLF15</i> antisense                      | 5'-CCTGGGACAATAGGAAGTCCAA-3' |        |
| <i>KLF16</i> sense                          | 5'-TTCTCGTCGCCAAAATGCC-3'    |        |
| <i>KLF16</i> antisense                      | 5'-CCTGGGACAATAGGAAGTCCAA-3' |        |
| <i>KLF17</i> sense                          | 5'-GCTGCCCAGGATAACGAGAAC-3'  |        |
| <i>KLF17</i> antisense                      | 5'-ATCTCTGCGCTGTGAGGAAAG-3'  |        |
| <i>TLR4</i> sense:                          | 5'-AGACCTGTCCCTGAACCCTAT-3'  |        |
| <i>TLR4</i> antisense:                      | 5'-CGATGGACTTCTAAACCAGCCA-3' |        |
| <i>PTK2</i> sense:                          | 5'-GCTTACCTTGACCCCAACTTG-3'  |        |
| <i>PTK2</i> antisense:                      | 5'-ACGTTCCATAACCAGTACCCAG-3' |        |
| <i>β-actin</i> sense:                       | 5'-CATGTACGTTGCTATCCAGGC-3'  |        |
| <i>β-actin</i> antisense:                   | 5'-CTCCTTAATGTCACGCACGAT-3'  |        |
| Primers for <i>TLR4</i> promoter construct: |                              |        |

(-1918/+473) *TLR4* sense: 5'-TATAGAGCTCAGAACTTACATTGCACT-3' SacI  
 (-464/+473) *TLR4* sense: 5'-TATAGAGCTCAAGCCTCTAGAATTGTGA-3' SacI  
 (-228/+473) *TLR4* sense: 5'-TATAGAGCTCTAGCTTCCTCTTGCTGTT-3' SacI  
 (-40/+473) *TLR4* sense: 5'-TATAGAGCTCGAGGAAGAGAAGACACCA-3' SacI  
 Antisense: 5'-ATATGCTAGCTGCGAAAAGTAGTCTCAG-3' NheI

Primers for *TLR4* promoter site-directed mutagenesis:

KLF7 binding site:

binding site 3 mutation sense: 5'-TTCACAAGAAGGtataGGCCAAATTGTGT-3'  
 binding site 3 mutation antisense: 5'-ACACAATTTGGCCtataCCTTCTTGTGAA-3'  
 binding site 2 mutation sense: 5'-CCTAAATTCACCGctaCCAGGCAGAGGTC-3'  
 binding site 2 mutation antisense: 5'-GACCTCTGCCTGGtagcGGTGAATTTAGG-3'  
 binding site 1 mutation sense: 5'-CAATTGCTGTGGtataGCTCGAGGAAGAG-3'  
 binding site 1 mutation antisense: 5'-CTCTTCCTCGAGctataCCACAGCAATTG-3'

Primers used for CHIP in the *TLR4* promoter:

distant region sense: 5'-TGGCTAGTTTGAATAACCTC-3'  
 distant region antisense: 5'-CTTATGCACACTAAGCAA-3'  
 binding site sense: 5'-AGACTTTTCCCAATCTTC-3'  
 binding site antisense: 5'-TACCTCTTTC AAGGCTCT-3'

Primers for *PTK2* promoter construct:

(-1540/+291) *PTK2* sense: 5'-TATAGAGCTCCTGCCCTTCAAGAACGTC-3' SacI  
 (-1008/+291) *PTK2* sense: 5'-TATAGAGCTCTGCAGTCCCTTTGTGCC-3' SacI  
 (-247/+291) *PTK2* sense: 5'-TATAGAGCTCATTTCCGACCACAAGGTT-3' SacI  
 (-42/+291) *PTK2* sense: 5'-TATAGAGCTCACGTTCCGGTCATAACCA-3' SacI  
 Antisense: 5'-ATATAGATCTCACACCGACCCTAACGAG-3' BglIII

Primers for *PTK2* promoter site-directed mutagenesis:

KLF7 binding site:

binding site 3 mutation sense: 5'-ATGCTTCACAGGtatgGGGTGGTCTAGTA-3'  
 binding site 3 mutation antisense: 5'-TACTAGACCACCCcataCCTGTGAAGCAT-3'  
 binding site 2 mutation sense: 5'-TGAGGATAGCAGtaagGTGGGTGGTTCCT-3'  
 binding site 2 mutation antisense: 5'-AGGAACCACCCACcttaCTGCTATCCTCA-3'  
 binding site 1 mutation sense: 5'-TTGCTATTTCCCCagtaCCACCTACGGCA-3'  
 binding site 1 mutation antisense: 5'-TGCCGTAGGTGGtactGGGGAAATAGCAA-3'

Primers used for CHIP in the *PTK2* promoter:

distant region sense: 5'-TAGCGTCTACATCACAGGGTT-3'  
 distant region antisense: 5'-CCAGAGCACAGAGTCAAGGA-3'  
 binding site 3 sense: 5'-GGCAGTTCTTCCATCAGT-3'  
 binding site 3 antisense: 5'-CCAAGCTAGCCTCACGAG-3'  
 binding site 2 sense: 5'-AGAGCGGACAATCAAGA-3'  
 binding site 2 antisense: 5'-CATTGATACAGCCGACCA-3'  
 binding site 1 sense: 5'-CAAAGGTTCCCTGTTGCCTA-3'  
 binding site 1 antisense: 5'-CCAGTTTCAGCGAGGAGCTA-3'

Primers for *KLF7* promoter construct:

(-1986/+336) *KLF7* sense: 5'-TATAGAGCTCACATGTAGAAAGGACAAA-3' SacI  
 (-1257/+336) *KLF7* sense: 5'-TATAGAGCTCGACTACAGGCGTGAGCCA-3' SacI

|                                 |                                    |      |
|---------------------------------|------------------------------------|------|
| (-1055/+336) <i>KLF7</i> sense: | 5'-TATAGAGCTCAAAACCTGCTTCTGACAT-3' | SacI |
| (-130/+336) <i>KLF7</i> sense:  | 5'-TATAGAGCTCTACTGACACTTTAGGTGC-3' | SacI |
| Antisense:                      | 5'-ATATCTCGAGGTCTCGGTGAATTAACCA-3' | XhoI |

Primers for *KLF7* promoter site-directed mutagenesis:

Binding site d (NF-κB binding site)

Binding site d mutation sense: 5'-TTGCAGTACAGAG**gagc**TCCATCAAATCAA-3'

Binding site d mutation antisense: 5'-TTGATTTGATGG**agctc**CTCTGTACTGCAA-3'

Binding site c (STAT3 binding site)

Binding site c mutation sense: 5'-TACTGGCTTCTTT**gac**AAATCTTTGTCCAG-3'

Binding site c mutation antisense: 5'-CTGGACAAAGATT**gac**AAAGAAGCCAGTA-3'

Binding site b (NF-κB binding site)

Binding site b mutation sense: 5'-TAGTGCTTGCTGG**tgca**TCCCTACCATTGG-3'

Binding site b mutation antisense: 5'-CCAATGGTAGGG**atgca**CCAGCAAGCACTA-3'

Binding site a (AP-1 binding site)

Binding site a mutation sense: 5'-ATATGTTGAAT**Gctga**ATTGAATTCAA-3'

Binding site a mutation antisense: 5'-TTGAATTCAAT**tcag**CATTCAACATAT-3'

Primers used for ChIP in the *KLF7* promoter:

distant region sense: 5'-GCCTGTTATTATATCACC-3'

distant region antisense: 5'-TCAGAATTTAAGGCACT-3'

binding site sense: 5'-CTGGCTTCACAACTATCTGG-3'

binding site antisense: 5'-CCCCATCTAAGAATAGCAT-3'

**Table S9.** Knockdown shRNA sequences used in this study

| Gene name    | Sequence              |
|--------------|-----------------------|
| KLF7 shRNA-1 | CTTGAATTGGAACGCTACCTA |
| KLF7 shRNA-2 | GCTACTTCTCAGCTTTACCAT |
| KLF7 shRNA-3 | CCACATGAAGAGACATATCTA |
| TLR4 shRNA-1 | GCCACCTCTCTACCTTAATAT |
| TLR4 shRNA-2 | CCCTGCTGGATGGTAAATCAT |
| TLR4 shRNA-3 | GTGGTTCCTAATATTACTTAT |
| PTK2 shRNA-1 | CGTGAAGATGTGGTCCTGAAT |
| PTK2 shRNA-2 | GAGAGCATGAAGCAAAGAATT |
| PTK2 shRNA-3 | CCGGTCGAATGATAAGGTGTA |
| RAGE shRNA-1 | CGAGTCCGTGTCTACCAGATT |
| RAGE shRNA-2 | GCGGCTGGAATGGAAACTGAA |
| RAGE shRNA-3 | CCGTGCTGTCAGCATCAGCAT |
| p65 shRNA-1  | CGGATTGAGGAGAAACGTAAA |
| p65 shRNA-2  | CACCATCAACTATGATGAGTT |
| p65 shRNA-3  | CCTGAGGCTATAACTCGCCTA |
| KLF5 shRNA   | CCTATAATTCCAGAGCATAAA |
| KLF8 shRNA   | CCCAGCACTGTTAATGACAT  |
| KLF13 shRNA  | CGGGCGAGAAGAAGTTCAGCT |



**Reference:**

1. Huang W, Chen Z, Shang X, Tian D, Wang D, Wu K, et al. Sox12, a direct target of FoxQ1, promotes hepatocellular carcinoma metastasis through up-regulating Twist1 and FGFBP1. *Hepatology*. 2015; 61: 1920-33.
2. Li W, Li Y, Siraj S, Jin H, Fan Y, Yang X, et al. FUN14 Domain-Containing 1-Mediated Mitophagy Suppresses Hepatocarcinogenesis by Inhibition of Inflammasome Activation in Mice. *Hepatology*. 2019; 69: 604-21.
3. Tang Z, Kang B, Li C, Chen T, Zhang Z. GEPIA2: an enhanced web server for large-scale expression profiling and interactive analysis. *Nucleic Acids Res*. 2019; 47: W556-W60.
4. Nagy A, Munkacsy G, Gyorffy B. Pancancer survival analysis of cancer hallmark genes. *Sci Rep*. 2021; 11: 6047.
